# Supplementary material for: The relationship between suicidal ideation and symptoms of depression in Japanese workers: a cross-sectional study
Source: PubMed Central journal article supplement — BMJ Open. 2013 Nov 29;3(11):e003643. doi: 10.1136/bmjopen-2013-003643 (PMC3845061; doi:10.1136/bmjopen-2013-003643), 2013-11-29
Supplement: bmjopen-2013-003643.draft_revisions.pdf [file bmjopen-2013-003643.draft_revisions.pdf]

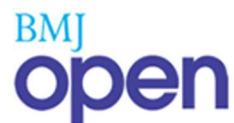

## The Relationship Between Suicidal Ideation and Symptoms of Depression in Japan

|                                 |                                                                                                                                                   |
|---------------------------------|---------------------------------------------------------------------------------------------------------------------------------------------------|
| Journal:                        | <i>BMJ Open</i>                                                                                                                                   |
| Manuscript ID:                  | bmjopen-2013-003643                                                                                                                               |
| Article Type:                   | Research                                                                                                                                          |
| Date Submitted by the Author:   | 24-Jul-2013                                                                                                                                       |
| Complete List of Authors:       | Takeuchi, Takeaki; Teikyo University School of Medicine, Psychosomatics<br>Nakao, Mutsuhiro; Teikyo University School of Medicine, Psychosomatics |
| <b>Primary Subject Heading</b>: | Occupational and environmental medicine                                                                                                           |
| Secondary Subject Heading:      | Mental health                                                                                                                                     |
| Keywords:                       | MENTAL HEALTH, Depression & mood disorders < PSYCHIATRY, Suicide & self-harm < PSYCHIATRY                                                         |
|                                 |                                                                                                                                                   |

SCHOLARONE™  
Manuscripts

Peer Review Only



## Abstract

**Objectives:** The prevalence of and potential for suicidal ideation among Japanese workers is unknown, although the prevalence of suicide among patients was reported by our previous study. Hence, we evaluated the prevalence of suicidal ideation and its relationship with depressive symptoms among Japanese workers.

**Methods:** For this purpose, a cross-sectional design was used. Major depressive disorder (MDD) and suicidal ideation in 1,266 workers (1100 men and 166 women, aged 20–69 years) were assessed through clinical interviews conducted in accordance with the fourth edition of the Diagnostic and Statistical Manual of Mental Disorders.

**Results:** A total of 34 and 70 participants were diagnosed with suicidal ideation and MDD, respectively. Suicidal ideation was especially prevalent in 40–49-year-olds. Six out of the eight symptoms of MDD (depressive mood, loss of interest, weight loss, psychomotor agitation, worthlessness, and concentration loss) were related to suicidal ideation. Depressive mood had the strongest relationship with suicidal ideation, followed by worthlessness and concentration loss. Worthlessness had the highest area under the curve in predicting suicidal ideation, followed by concentration loss and depressive mood.

**Conclusions:** We conclude that MDD symptoms—particularly depressive mood, worthlessness, and concentration loss—are potential predictors of suicidal ideation in Japanese workers.

### Article focus

- To determine the prevalence of suicidal ideation in Japanese workers because of the lack of data in the working population.
- To examine the symptoms of major depressive disorder (MDD) that relate to suicidal ideation hypothesizing that these serve as possible predictors of suicide.

### Key messages

- The prevalence of suicidal ideation was 2.7% in Japanese workers.
- Six symptoms of MDD, particularly depressive mood, worthlessness and concentration loss were related to suicidal ideation.
- These seem to be potential predictors that can be used in identifying suicidal ideation among Japanese workers, treating these symptoms as clear warning signs for dealing with suicidal risk

### Strengths and limitations of this study

- This is the first evaluation of suicidal ideation among workers in Japan, which has one of the highest rates of suicide worldwide.
- Assessment of MDD including suicidal ideation were made by clinical interviews based on the Diagnostic Statistical Manual of Mental Disorders Fourth Edition, Text Revision.
- Results do not directly imply that symptoms of MDD and suicidal ideation are part of a clinical continuum because of its cross-sectional nature.
- Results do not directly represent the general population of Japanese workers because of the small sample size.

1  
2  
3 Although Japan has the highest global ranking for longevity, it also has one of the highest  
4  
5 suicide rates, being ranked 9<sup>th</sup> for men and 3<sup>rd</sup> for women in the world<sup>1</sup>. From 1995 to 1998, the  
6  
7 incidence of reported suicide rose dramatically from 17 to 25 per 100,000 people, and that high  
8  
9 rate continued even in 2010<sup>2,3</sup>. Since 2005, the Japanese Cabinet Office and the Ministry of  
10  
11 Health, Labour and Welfare have been attempting to reduce the suicide rate; however, outcome  
12  
13 has yet been observed clearly.  
14  
15

16  
17 To reduce the number of suicides, collaborative care models for treating depression have  
18  
19 shown potential in both improving depression outcomes and decreasing suicide risk<sup>4</sup>. However,  
20  
21 with the exception of psychiatrists or psychological specialists, most doctors find it difficult to  
22  
23 diagnose depression because of the complexities involved in administering clinical interviews. In  
24  
25 addition, doctors must pay attention to those who do not perfectly match the diagnostic criteria<sup>5</sup>.  
26  
27 If depression is not diagnosed appropriately, it might be difficult to find the pathway that leads to  
28  
29 suicide.  
30  
31  
32  
33

34 Thus, instead of investigating the potential for depression, it would be much simpler and  
35  
36 more useful to determine the presence of suicidal ideation in individuals to assess their suicide  
37  
38 risk. Suicidal ideation, which refers to wishing that one's life would end or thoughts of harming  
39  
40 or killing oneself, represents an important phase in the suicidal process and often precedes  
41  
42 suicidal attempts or death by suicide. In clinical settings, it is relatively straightforward to ask  
43  
44 patients whether they have suicidal ideation, because this is one of the most important routine  
45  
46 questions in mental health<sup>6</sup>. Our previous study reported the prevalence of suicidal ideation  
47  
48 among clinics<sup>7</sup>. Naturally, attempted suicide is one of the strongest risk factors for death by  
49  
50 suicide<sup>9-11</sup>, and 60% of planned first attempts occur within the first year of ideation onset<sup>9</sup>.  
51  
52  
53  
54 Therefore, identifying those people with suicidal ideation would be logically the first step in  
55  
56  
57  
58  
59  
60

1  
2  
3 reducing the incidence of suicide.  
4

5 One problem is that, in screening process such as workplaces, it might be difficult to  
6 identify people with suicidal ideation because asking workers whether they had suicidal ideation  
7 could lead to conflicts in their relationships. In addition, people from Asian countries are  
8 sometimes reluctant to speak about their mental condition, including suicidal ideation, even to  
9 their physicians, because it is considered taboo<sup>2</sup>. The Japanese in particular are less willing to  
10 express emotional distress or feelings such as suicidal ideation compared with Westerners<sup>12,13</sup>.  
11 Therefore, instead of identifying suicidal ideation, identifying the symptoms closely related to  
12 suicidal ideation would be useful in determining an individual's risk of suicide.  
13  
14

15 In Japan, more than 30,000 people have committed suicide each year for the past 10 years,  
16 and 27% of them were working people<sup>3</sup>. Thus, we thought that it was highly important to  
17 identify the prevalence of suicidal ideation and the symptoms that are closely related to suicidal  
18 ideation in the working population in Japan.  
19  
20

21 The aims of this study were twofold. First, we attempted to determine the prevalence of  
22 suicidal ideation in Japanese workers because of the lack of data at present on the prevalence of  
23 suicidal ideation in working population. Second, we examined the symptoms of major depressive  
24 disorder (MDD), hypothesizing that some of these symptoms would be strongly related to  
25 suicidal ideation, and thus serve as possible predictors.  
26  
27

## 28 **Methods**

### 29 **Participants and ethical considerations**

30 A cross-sectional design was used. Data were obtained from 1,314 full-time office  
31 workers attending health examinations in an enterprise in Tokyo, Japan. Due to missing health  
32  
33  
34  
35  
36  
37  
38  
39  
40  
41  
42  
43  
44  
45  
46  
47  
48  
49  
50  
51  
52  
53  
54  
55  
56  
57  
58  
59  
60

1  
2  
3 examination data, we excluded 48 participants, and thus, we analyzed the data from 1,266  
4  
5 Japanese workers (96% of the total number of employees, 1100 men and 166 women aged 20–69  
6  
7 years). All participants provided written informed consent after receiving a complete explanation  
8  
9 regarding the purpose, nature, and risks of the procedures used. This study was performed in  
10  
11 accordance with the World Medical Association’s Declaration of Helsinki, and its protocol was  
12  
13 approved by the Ethics Committee of the Teikyo University School of Medicine and the  
14  
15 company’s labor safety committee.  
16  
17  
18

### 19 **Assessment of major depressive disorder including suicidal ideation**

20  
21 To ascertain whether each participant met the Diagnostic Statistical Manual of Mental  
22  
23 Disorders Fourth Edition, Text Revision (DSM-IV) criteria for MDD, clinical interviews for  
24  
25 DSM-IV axis I disorders were conducted by two study physicians specializing in both psychiatry  
26  
27 and psychosomatic medicine, assisted by a researcher trained in psychology. Suicidal ideation  
28  
29 was also evaluated during the interviews. To confirm the diagnosis of suicidal ideation,  
30  
31 interviewees underwent additional independent interviews that specifically focused on suicidal  
32  
33 ideation.  
34  
35  
36  
37

### 38 **Assessment of lifestyle factors**

39  
40 A structured questionnaire administered by the physician was used to assess lifestyle  
41  
42 factors, including smoking status, alcohol consumption, exercise, and sleep disturbances<sup>14</sup>. Based  
43  
44 on their smoking history, the subjects were classified into three categories: current smokers, past  
45  
46 smokers, and non-smokers (no history of smoking). Alcohol consumption was classified into  
47  
48 three categories based on the weekly frequency of consumption: 6–7 times/week, 1–5  
49  
50 times/week, and occasional drinking. Exercise was classified into two categories: regular or  
51  
52 irregular. Sleep disturbances were assessed on a subjective basis, and anxiety was scored as  
53  
54  
55  
56  
57  
58  
59  
60

1  
2  
3 present or absent, based on answers to additional questions during the DSM-IV interview.  
4  
5  
6

### 7 8 **Sample size** 9

10 Based on our previous study<sup>7,8</sup>, we expected to find a difference of 30% in the rate of  
11 each symptom between both groups with and without suicidal ideation. To achieve a power of  
12 0.90 given a two-sided  $\alpha$  of 0.05, and a ratio of our exposed sample to our control  
13 sample of 1:25, we needed at least 32 participants in the group with suicidal ideation and 800  
14 participants without suicidal ideation. Finally, through the actual data collection we collected 34  
15 participants with suicidal ideation and 1232 participants without suicidal ideation.  
16  
17  
18  
19  
20  
21  
22  
23  
24  
25  
26

### 27 **Statistical analysis** 28

29 After the characteristics of the study population were descriptively evaluated according to  
30 the presence of suicidal ideation, multiple logistic regression analyses were used to evaluate the  
31 association between suicidal ideation and MDD, by calculating crude and adjusted odds ratios  
32 (ORs). The ratios were adjusted for potential confounding factors to depression and suicide, such  
33 as sex, age, and three lifestyle factors (smoking status, alcohol consumption, and exercise).  
34 Finally, receiver operating curve (ROC) analyses were performed to examine the predictive  
35 potentials of MDD symptoms for suicidal ideation. Statistical significance was inferred at  $p <$   
36 0.05 (two-tailed) for both the crude and adjusted ORs of the logistic analyses and the test  
37 equality of the area under the curve (AUC). All analyses were performed using STATA version  
38 11.  
39  
40  
41  
42  
43  
44  
45  
46  
47  
48  
49  
50  
51

### 52 **Results** 53 54 55 56 57 58 59 60



1  
2  
3 A total of 34 (2.7%, 95% confidence interval [1.8, 3.8]) and 70 (5.5%, 95% CI [4.3, 6.8])  
4  
5 people were diagnosed with having suicidal ideation and MDD, respectively. Those with suicidal  
6  
7 ideation were more likely to be women, aged between 40 and 49 years, drinkers, and not  
8  
9 exercising regularly (Table 1). Only the age factor (i.e., being in one's 40s) significantly differed  
10  
11 between participants with and without suicidal ideation. Six out of the eight symptoms of MDD  
12  
13 (depressive mood, loss of interest, weight loss, psychomotor agitation, worthlessness, and  
14  
15 concentration loss) were related to suicidal ideation in both the crude and adjusted analyses  
16  
17  
18  
19  
20 (Table 2).

21  
22 Depressive mood had the strongest relationship to suicidal ideation (OR 11.2, 95% CI  
23  
24 [5.4, 23.0]), followed by worthlessness (OR 8.5, 95% CI [4.1, 17.4]) and then concentration loss  
25  
26 (OR 6.1, 95% CI [4.1, 17.4]).

27  
28 Worthlessness had the highest AUC (0.73, 95% CI [0.71, 0.76]) in predicting suicidal  
29  
30 ideation, followed by concentration loss (0.71, 95% CI [0.62, 0.79]) and then depressive mood  
31  
32 (0.69, 95% CI [0.66, 0.71]).  
33  
34  
35  
36

## 37 Discussion

38  
39 Our study revealed that the prevalence of suicidal ideation was 2.7% in Japanese workers.  
40  
41 In addition, we found that six symptoms of depression, particularly depressive mood,  
42  
43 worthlessness, and concentration loss, were related to suicidal ideation. These are potential  
44  
45 predictors that can be used in identifying suicidal ideation among Japanese workers. As we  
46  
47 expected, suicidal ideation was less prevalent in Japanese workers than in Western populations<sup>15</sup>.  
48  
49 We may have to consider that this low prevalence of suicidal ideation is not reflective of a low  
50  
51 prevalence in the general population, because some Japanese people are reluctant to speak about  
52  
53 their mental condition. While we will need to reconsider this prevalence rate in the near future,  
54  
55  
56  
57  
58  
59  
60

1  
2  
3 this rate is useful as one of the first evaluations of suicidal ideation among workers in Japan,  
4  
5 which has one of the highest rates of completed suicide worldwide.  
6  
7

8 Although there is no way to predict who will eventually die by suicide, treating the clear  
9  
10 warning signs for suicide can reduce patients' suffering. This study revealed a significantly  
11  
12 positive association between some symptoms of depression and suicidal ideation. In countries  
13  
14 like Japan, where people are reluctant to express their feelings, these symptoms might be useful  
15  
16 in estimating an individual's risk of suicidal ideation and eventual suicide<sup>4,15</sup>.  
17  
18

19  
20 Some of the above symptoms (depressive mood, worthlessness, and concentration loss)  
21  
22 are similar to symptoms found to be predictors of suicidal ideation in previous studies<sup>15,16</sup>. Only  
23  
24 concentration loss was a new predictor, which might be due to the characteristics of our study  
25  
26 sample. For workers, concentration loss would be a particularly salient symptom due to its  
27  
28 interruption of their daily work.  
29  
30

31  
32 Our results also showed that while participants who were women, between 40 and 49  
33  
34 years old, drinkers, and not exercising regularly had a higher tendency for suicidal ideation, only  
35  
36 being in one's 40s was statistically significant in this study. This finding would be reasonable  
37  
38 because the greatest increase in the number of deaths by suicide in the last decade in Japan  
39  
40 occurred among 40–49-year-old workers<sup>3</sup>. Although not statistically significant, heavy drinking  
41  
42 has been shown to be associated with a higher risk of alcohol abuse, and not exercising regularly  
43  
44 is associated with a greater risk of poor mental health<sup>1</sup>. We believe that completed suicides are  
45  
46 likely to have a background of suicidal ideation. Thus, our recommended strategy to reduce  
47  
48 suicide based on this research is to identify its potential risk by asking indirect questions related  
49  
50 to suicidal ideation, including questions related to depressive mood, worthlessness, and  
51  
52 concentration loss, because these symptoms appear to be related to the presence of suicidal  
53  
54  
55  
56  
57  
58  
59  
60

1  
2  
3 ideation, which in turn increases the likelihood of completed suicide.  
4

5  
6 Several limitations of this study warrant consideration. First, because of its cross-  
7  
8 sectional nature, our results do not directly imply that symptoms of MDD and suicidal ideation  
9  
10 are part of a clinical continuum, but rather that a simple statistical association exists after  
11  
12 adjusting for important confounding factors. Second, because of the small sample size, the  
13  
14 results do not directly represent the general population of Japanese workers. However, this is one  
15  
16 of the first studies to report the prevalence of suicidal ideation in Japanese workers. Thus, this  
17  
18 report could be of paramount importance in Japan, where many people are reluctant to discuss  
19  
20 their mental condition.  
21  
22

### 23 24 **Acknowledgements**

25  
26 This research was supported in part by Grant-in-Aid for Scientific Research (2009-2012)  
27  
28 (C) from the Ministry of Education, Science, Sports and Culture, Japan; and Research Grant  
29  
30 (2011-2014) for Health and Welfare from Ministry of Health, Labour and Welfare, Japan (No.  
31  
32 24590761).  
33  
34

### 35 36 **Contributorship**

37  
38 Takeaki Takeuchi and Mutsuhiro Nakao collected and analyzed the data; Takeaki Takeuchi wrote  
39  
40 the manuscript; Mutsuhiro Nakao reviewed and edited the manuscript and helped in its analysis.  
41  
42

43  
44 All authors contributed to the discussion.  
45

### 46 47 **Data sharing statements**

48  
49 There is no additional data available.  
50

### 51 52 **Funding**

53  
54 None

55  
56 **Competing Interests** None  
57  
58  
59  
60

## References

1. World Health Organization. Suicide rates per 100,000 by country, year and sex. 2011.  
[http://www.who.int/mental\\_health/prevention/suicide\\_rates/en/](http://www.who.int/mental_health/prevention/suicide_rates/en/) (accessed 12 January 2013)
2. Nakao M, Takeuchi T. The suicide epidemic in Japan and strategies of depression screening for its prevention. *Bull World Health Organ* 2006;**84**:492–493.
3. National Police Agency. Japan's suicide statistics in 2010.  
<http://www.npa.go.jp/safetylife/seianki/H22jisatsunogaiyou.pdf> (accessed 14 July 2013)
4. McDowell AK, Lineberry TW, Bostwick JM. Practical suicide-risk management for the busy primary care physician. *Mayo Clin Proc* 2011;**86**:792–800.
5. Zhang Y, Law CK, Yip PS. Psychological factors associated with the incidence and persistence of suicidal ideation. *J Affect Disord* 2011;**133**:584–590.
6. American Psychiatric Association. Practice guidelines for the treatment of psychiatric disorders compendium 2004. Tokyo, Japan: Igaku Shoin 2006: 1–966.
7. Nakao M, Yamanaka G, Kuboki T. Suicidal ideation and somatic symptoms of patients with mind/body distress in a Japanese psychosomatic clinic. *Suicide Life Threat Behav* 2002;**32**:80–90.
8. Takeuchi T, Nakao M, Yano E. Screening for major depression in the workplace: testing diagnostic accuracy of a two-item questionnaire used during mandatory testing. *Prim Care Community Psychiatr* 2006;**11**:13–19.
9. Kessler RC, Borgers G, Walters EE. Prevalence of and risk factors for lifetime suicide attempts in the National Comorbidity Survey. *Arch Gen Psychiatry* 1999;**56**:617–626.

- 1  
2  
3 10. **Suominen K**, Isometsä E, Suokas J, *et al*. Completed suicide after a suicide attempt: A 37-  
4  
5 year follow-up study. *Am J Psychiatry* 2004;**161**:562–563.  
6  
7
- 8 11. **ten Have M**, De Graaf R, van Dorsselaer S, *et al*. Incidence and course of suicidal ideation  
9  
10 and suicide attempts in the general population. *Can J Psychiatry* 2009;**54**:824–833.  
11  
12
- 13 12. **Kleinman, A**. Neurasthenia and depression: A study of somatization and culture in China.  
14  
15 *Cult Med Psychiatry* 1982;**6**:117–190.  
16  
17
- 18 13. **Simon G**, Von Korff M, Piccinelli M, *et al*. An international study of the relation between  
19  
20 somatic symptoms and depression. *N Engl J Med* 1999;**341**:1329–1335.  
21  
22
- 23 14. **Nakao M**, Yano E. Prediction of major depression in Japanese adults: Somatic manifestation  
24  
25 of depression in annual health examinations. *J Affect Disord* 2006;**90**:29–35.  
26  
27
- 28 15. **van Gastel A**, Schotte C, Maes M. The prediction of suicidal intent in depressed patients.  
29  
30 *Acta Psychiatr Scand* 1997;**96**:254–259.  
31  
32
- 33 16. **Hawton K**, van Heeringen K. Suicide. *Lancet* 2009;**18**:1372–1381.  
34  
35  
36  
37  
38  
39  
40  
41  
42  
43  
44  
45  
46  
47  
48  
49  
50  
51  
52  
53  
54  
55  
56  
57  
58  
59  
60

Table 1

*Prevalence of suicide ideation and sociodemographic characteristics of individuals with and without suicide ideation (N = 1266)*

| Variable                   | Suicidal ideation<br>+ (n = 34) |              | Suicidal ideation<br>- (n = 1232) |              | OR  | 95% CI      |
|----------------------------|---------------------------------|--------------|-----------------------------------|--------------|-----|-------------|
|                            | %                               | 95% CI       | %                                 | 95% CI       |     |             |
| Sex                        |                                 |              |                                   |              |     |             |
| Male                       | 79.4                            | [62.1, 91.3] | 87.1                              | [85.1, 88.9] | 0.6 | [0.2, 1.3]  |
| Female                     | 21.6                            | [8.7, 37.9]  | 12.9                              | [11.1, 14.9] | 1.0 | [1.0, 1.0]  |
| Age                        |                                 |              |                                   |              |     |             |
| 20–29                      | 14.7                            | [2.6, 26.8]  | 9.3                               | [7.6, 10.9]  | 1.6 | [1.0, 2.5]  |
| 30–39                      | 26.5                            | [11.4, 41.5] | 29.9                              | [27.3, 32.4] | 1.5 | [0.8, 2.8]  |
| 40–49                      | 47.1                            | [30.0, 64.1] | 29.9                              | [27.3, 32.4] | 4.2 | [1.4, 12.5] |
| 50+                        | 11.7                            | [0.4, 23.2]  | 30.9                              | [28.4, 33.6] | 1.0 | [1.0, 1.0]  |
| Smoking status             |                                 |              |                                   |              |     |             |
| Current                    | 38.2                            | [21.6, 54.8] | 36.4                              | [33.6, 39.1] | 1.0 | [0.7, 1.5]  |
| Past                       | 26.5                            | [11.4, 41.5] | 31.0                              | [28.4, 33.6] | 0.8 | [0.3, 1.9]  |
| Never                      | 35.3                            | [19.0, 51.6] | 32.6                              | [30.0, 35.3] | 1.0 | [1.0, 1.0]  |
| Alcohol consumption        |                                 |              |                                   |              |     |             |
| Every day (6–7 times/week) | 29.4                            | [13.9, 45.0] | 18.8                              | [16.6, 20.9] | 0.7 | [0.4, 1.1]  |
| Often (1–5 times/week)     | 47.1                            | [30.0, 64.1] | 46.5                              | [43.7, 49.3] | 0.6 | [0.3, 1.4]  |
| No regular drinking        | 23.5                            | [9.0, 38.0]  | 34.7                              | [32.1, 37.4] | 1.0 | [1.0, 1.0]  |
| Exercise                   |                                 |              |                                   |              |     |             |
| Irregular                  | 70.6                            | [52.5, 84.9] | 62.1                              | [59.3, 64.8] | 1.5 | [0.7, 3.1]  |
| Regular                    | 29.4                            | [15.1, 47.5] | 37.9                              | [35.2, 40.7] | 1.0 | [1.0, 1.0]  |

Table 2

Association of MDD symptoms with suicidal ideation (N = 1266)

| MDD symptoms          | n (%)      | Suicidal ideation (n = 34)    |                           |                           | Sensitivity, % | Specificity, % | AUC (95% CI)      |
|-----------------------|------------|-------------------------------|---------------------------|---------------------------|----------------|----------------|-------------------|
|                       |            | Model 1*                      | Model 2†                  | Model 3‡                  |                |                |                   |
|                       |            | (Non-adjusted)<br>OR (95% CI) | (Adjusted)<br>OR (95% CI) | (Adjusted)<br>OR (95% CI) |                |                |                   |
| Depressive mood       | 92 (7.3)   | 11.8 [5.8, 24.2]              | 11.5 [5.6, 23.6]          | 11.2 [5.4, 23.0]          | 44.1           | 93.8           | 0.69 [0.66, 0.71] |
| Loss of interest      | 117 (9.2)  | 3.2 [1.4, 7.2]                | 3.5 [1.5, 7.9]            | 3.5 [1.5, 8.0]            | 23.5           | 91.2           | 0.57 [0.55, 0.60] |
| Weight loss           | 48 (3.8)   | 4.8 [1.8, 12.9]               | 4.9 [1.8, 13.5]           | 5.0 [1.8, 13.8]           | 14.7           | 96.5           | 0.56 [0.53, 0.58] |
| Insomnia              | 455 (35.9) | 2.0 [1.0, 4.1]                | 1.9 [1.0, 3.8]            | 1.8 [0.9, 3.7]            | 52.9           | 64.5           | 0.59 [0.56, 0.61] |
| Psychomotor agitation | 741 (58.5) | 2.4 [1.1, 5.2]                | 2.2 [1.0, 5.0]            | 2.2 [1.0, 4.9]            | 76.5           | 42.0           | 0.59 [0.56, 0.62] |
| Fatigue               | 920 (72.7) | 2.9 [1.0, 8.2]                | 2.6 [0.9, 7.6]            | 2.6 [0.9, 7.5]            | 61.8           | 84.7           | 0.58 [0.55, 0.61] |
| Worthlessness         | 210 (16.6) | 8.9 [4.4, 18.1]               | 8.6 [4.2, 17.5]           | 8.5 [4.1, 17.4]           | 61.8           | 84.7           | 0.73 [0.71, 0.76] |
| Concentration loss    | 274 (21.6) | 6.3 [3.1, 12.7]               | 6.3 [3.1, 12.8]           | 6.1 [3.0, 12.5]           | 61.8           | 79.5           | 0.71 [0.62, 0.79] |

\*Model 1 was the crude analysis. †Model 2 was adjusted for sex and age (used as categorical variables). ‡Model 3 was adjusted for sex, age (used as categorical variables), and lifestyle factors (smoking status, alcohol consumption, and exercise).



**The Relationship between Suicidal Ideation and Symptoms of Depression in Japanese Workers: A Cross sectional Study**

|                                 |                                                                                                                                                   |
|---------------------------------|---------------------------------------------------------------------------------------------------------------------------------------------------|
| Journal:                        | <i>BMJ Open</i>                                                                                                                                   |
| Manuscript ID:                  | bmjopen-2013-003643.R1                                                                                                                            |
| Article Type:                   | Research                                                                                                                                          |
| Date Submitted by the Author:   | 09-Oct-2013                                                                                                                                       |
| Complete List of Authors:       | Takeuchi, Takeaki; Teikyo University School of Medicine, Psychosomatics<br>Nakao, Mutsuhiro; Teikyo University School of Medicine, Psychosomatics |
| <b>Primary Subject Heading</b>: | Occupational and environmental medicine                                                                                                           |
| Secondary Subject Heading:      | Mental health                                                                                                                                     |
| Keywords:                       | MENTAL HEALTH, Depression & mood disorders < PSYCHIATRY, Suicide & self-harm < PSYCHIATRY                                                         |
|                                 |                                                                                                                                                   |

SCHOLARONE™  
Manuscripts

Peer Review Only



1  
2  
3 **The Relationship between Suicidal Ideation and Symptoms of Depression in Japanese**  
4 **Workers: A Cross sectional Study**  
5  
6  
7

8  
9 Takeaki Takeuchi<sup>1)</sup>

10  
11 Mutsuhiro Nakao<sup>1)</sup>  
12  
13

- 14  
15  
16 1. Department of Hygiene and Public Health and Division of Psychosomatic Medicine, Teikyo  
17  
18 University School of Medicine, Tokyo, Japan  
19  
20

21  
22  
23  
24  
25 Author Contribution

26  
27 Takeaki Takeuchi and Mutsuhiro Nakao collected and analyzed the data; Takeaki  
28  
29 Takeuchi wrote the manuscript; Mutsuhiro Nakao reviewed and edited the manuscript and helped  
30  
31 in its analysis. All authors contributed to the discussion. No author has any conflicts of interest to  
32  
33 declare.  
34  
35

36  
37 Correspondence concerning this article should be addressed to Takeaki Takeuchi,  
38  
39 Department of Hygiene and Public Health, Teikyo University School of Medicine 2-11-1 Kaga,  
40  
41 Itabashi, Tokyo 173-8605 Japan.

42  
43 E-mail: takeakij@post.harvard.edu  
44

45  
46 Word Count: 1867  
47

48  
49 Number of tables: 2  
50

51 *Keywords:* Japan; Major depressive disorder; Suicidal ideation; Workers  
52  
53  
54  
55  
56  
57  
58  
59  
60

## Abstract

**Objectives:** The prevalence of **suicidal ideation** and **predictors** for suicidal ideation among Japanese workers is unknown, **although a previous study reported a 30 % prevalence rate of suicide in a psychosomatic clinical setting.** Hence, we evaluated the prevalence of suicidal ideation and its relationship with depressive symptoms among Japanese workers.

**Methods:** For this purpose, a cross-sectional design was used. Major depressive disorder (MDD) and suicidal ideation in 1,266 workers (1100 men and 166 women, aged 20–69 years) were assessed through clinical interviews conducted in accordance with the fourth edition of the Diagnostic and Statistical Manual of Mental Disorders.

**Results:** A total of 34 and 70 participants were diagnosed with suicidal ideation and MDD, respectively. Suicidal ideation was especially prevalent in 40–49-year-olds. Six out of the eight symptoms of MDD (depressive mood, loss of interest, weight loss, psychomotor agitation, worthlessness, and concentration loss) were related to suicidal ideation. Depressive mood had the strongest relationship with suicidal ideation, followed by worthlessness and concentration loss. Worthlessness had the highest area under the curve in predicting suicidal ideation, followed by concentration loss and depressive mood.

**Conclusions:** We conclude that MDD symptoms—particularly depressive mood, worthlessness, and concentration loss—are potential predictors of suicidal ideation in Japanese workers.

### Article focus

- To determine the prevalence of suicidal ideation in Japanese workers because of the lack of data in the working population.
- To examine the symptoms of major depressive disorder (MDD) that relate to suicidal ideation hypothesizing that these serve as possible predictors of suicide.

### Key messages

- The prevalence of suicidal ideation was 2.7% in Japanese workers.
- Six symptoms of MDD, particularly depressive mood, worthlessness and concentration loss were related to suicidal ideation.
- These seem to be potential predictors that can be used in identifying suicidal ideation among Japanese workers, treating these symptoms as clear warning signs for dealing with suicidal risk

### Strengths and limitations of this study

- This is the first evaluation of suicidal ideation among workers in Japan, which has one of the highest rates of suicide worldwide.
- Assessment of MDD including suicidal ideation were made by clinical interviews based on the Diagnostic Statistical Manual of Mental Disorders Fourth Edition, Text Revision.
- Results do not directly imply that symptoms of MDD and suicidal ideation are part of a clinical continuum because of its cross-sectional nature.
- Results do not directly represent the general population of Japanese workers because of the small sample size.

1  
2  
3  
4  
5  
6  
7  
8  
9  
10  
11  
12  
13  
14  
15  
16  
17  
18  
19  
20  
21  
22  
23  
24  
25  
26  
27  
28  
29  
30  
31  
32  
33  
34  
35  
36  
37  
38  
39  
40  
41  
42  
43  
44  
45  
46  
47  
48  
49  
50  
51  
52  
53  
54  
55  
56  
57  
58  
59  
60

Although Japan has the highest global ranking for longevity, it also has one of the highest suicide rates, being ranked 9<sup>th</sup> for men and 3<sup>rd</sup> for women in the world<sup>1</sup>. From 1995 to 1998, the incidence of reported suicide rose dramatically from 17 to 25 per 100,000 people, and that high rate continued even in 2010<sup>2,3</sup>. Since 2005, the Japanese Cabinet Office and the Ministry of Health, Labour and Welfare have been attempting to reduce the suicide rate; **however the suicide rate in Japan has not decreased.**

To reduce the number of suicides, **collaborative care, that is, structured care involving a greater role of nonmedical specialists for treating depression** have shown potential in both improving depression outcomes and decreasing suicide risk<sup>4</sup>. However, with the exception of psychiatrists or psychological specialists, most doctors find it difficult to diagnose depression because of the complexities involved in administering clinical interviews. In addition, doctors must pay attention to those who do not perfectly match the diagnostic criteria<sup>5</sup>. If depression is not diagnosed appropriately, it might be difficult to find the pathway that leads to suicide.

**In addition to** investigating the potential for depression, it would be much simpler and more useful to determine the presence of suicidal ideation in individuals to assess their suicide risk. Suicidal ideation, which refers to wishing that one's life would end or thoughts of harming or killing oneself, represents an important phase in the suicidal process and often precedes suicidal attempts or death by suicide. In clinical settings, it is relatively straightforward to ask patients whether they have suicidal ideation, because this is one of the most important routine questions in mental health<sup>6</sup>. Our previous study reported the prevalence of suicidal ideation **(30%) in a psychosomatic clinical setting**<sup>7</sup>. Naturally, attempted suicide is one of the strongest risk factors for death by suicide<sup>8-11</sup>, and 60% of planned first attempts occur within the first year of ideation onset<sup>9</sup>. Therefore, identifying those people with suicidal ideation would be logically

1  
2  
3 the first step in reducing the incidence of suicide.  
4

5 One problem is that, in screening process such as workplaces, it might be difficult to  
6 identify people with suicidal ideation because asking workers whether they had suicidal ideation  
7 could lead to conflicts in their relationships. In addition, people from Asian countries are  
8 sometimes reluctant to speak about their mental condition, including suicidal ideation, even to  
9 their physicians, because it is considered taboo<sup>2</sup>. The Japanese in particular are less willing to  
10 express emotional distress or feelings such as suicidal ideation compared with Westerners<sup>12,13</sup>.  
11 Therefore, **we try to identify both suicidal ideation and the symptoms closely related to**  
12 **suicidal ideation in determining an individual's risk of suicide.**  
13  
14  
15  
16  
17  
18  
19  
20  
21  
22  
23

24 In Japan, more than 30,000 people, **25 per 100,000 people**, have committed suicide each  
25 year for the past 10 years, and 27% of them were working people<sup>3</sup>. Thus, we thought that it was  
26 highly important to identify the prevalence of suicidal ideation and the symptoms that are closely  
27 related to suicidal ideation in the working population in Japan.  
28  
29  
30  
31  
32  
33

34 The aims of this study were twofold. First, we attempted to determine the prevalence of  
35 suicidal ideation in Japanese workers because of the lack of data at present on the prevalence of  
36 suicidal ideation in working population. Second, we examined the symptoms of major depressive  
37 disorder (MDD), hypothesizing that some of these symptoms would be strongly related to  
38 suicidal ideation, and thus serve as possible predictors.  
39  
40  
41  
42  
43  
44  
45  
46  
47

## 48 **Methods**

### 49 **Participants and ethical considerations**

50 A cross-sectional design was used. Data were obtained from 1,314 full-time office  
51 workers attending health examinations in an enterprise in Tokyo, Japan. Due to missing health  
52  
53  
54  
55  
56  
57  
58  
59  
60

1  
2  
3 examination data, we excluded 48 participants, and thus, we analyzed the data from 1,266  
4  
5 Japanese workers (96% of the total number of employees, 1100 men and 166 women aged 20–69  
6  
7 years). All participants provided written informed consent after receiving a complete explanation  
8  
9 regarding the purpose, nature, and risks of the procedures used. This study was performed in  
10  
11 accordance with the World Medical Association’s Declaration of Helsinki, and its protocol was  
12  
13 approved by the Ethics Committee of the Teikyo University School of Medicine and the  
14  
15 company’s labor safety committee.  
16  
17  
18

### 19 20 **Assessment of major depressive disorder including suicidal ideation**

21  
22 To ascertain whether each participant met the Diagnostic Statistical Manual of Mental  
23  
24 Disorders Fourth Edition, Text Revision (DSM-IV)<sup>14</sup> criteria for MDD, clinical interviews for  
25  
26 DSM-IV axis I disorders were conducted by two study physicians specializing in both psychiatry  
27  
28 and psychosomatic medicine, assisted by a researcher trained in psychology. Suicidal ideation  
29  
30 was also evaluated during the interviews. To confirm the diagnosis of suicidal ideation,  
31  
32 interviewees underwent additional independent interviews that specifically focused on suicidal  
33  
34 ideation.  
35  
36  
37

### 38 39 **Assessment of lifestyle factors**

40  
41 A structured questionnaire administered by the physician was used to assess lifestyle  
42  
43 factors, including smoking status, alcohol consumption, and exercise<sup>15</sup>. Based on their smoking  
44  
45 history, the subjects were classified into three categories: current smokers, past smokers, and  
46  
47 non-smokers (no history of smoking). Alcohol consumption was classified into three categories  
48  
49 based on the weekly frequency of consumption: 6–7 times/week, 1–5 times/week, and occasional  
50  
51 drinking. Exercise was classified into two categories: regular or irregular. These questions were  
52  
53 asked as additional questions during the DSM-IV interview.  
54  
55  
56  
57  
58  
59  
60

## Sample size

Based on our previous study<sup>7,8</sup>, we expected to find a difference of 30% in the rate of each symptom between both groups with and without suicidal ideation. To achieve a power of 0.90 given a two-sided  $\alpha$  of 0.05, and a ratio of our exposed sample to our control sample of 1:25, we needed at least 32 participants in the group with suicidal ideation and 800 participants without suicidal ideation. Finally, through the actual data collection we collected 34 participants with suicidal ideation and 1232 participants without suicidal ideation.

## Statistical analysis

After the characteristics of the study population were descriptively evaluated according to the presence of suicidal ideation, multiple logistic regression analyses were used to evaluate the association between suicidal ideation and **each MDD symptom**, by calculating crude and adjusted odds ratios (ORs). The ratios were adjusted for potential confounding factors to depression and suicide, such as sex, age, and three lifestyle factors (smoking status, alcohol consumption, and exercise). Finally, receiver operating curve (ROC) analyses were performed to examine the predictive potentials of MDD symptoms for suicidal ideation. Statistical significance was inferred at  $p < 0.05$  (two-tailed) for both the crude and adjusted ORs of the logistic analyses and the test equality of the area under the curve (AUC). All analyses were performed using STATA version 11.

## Results

A total of 34 (2.7%, 95% confidence interval [1.8, 3.8]) and 70 (5.5%, 95% CI [4.3, 6.8])

1  
2  
3 people were diagnosed with having suicidal ideation and MDD, respectively. Those with suicidal  
4  
5 ideation were more likely to be aged between 40 and 49 years, drinkers, and not exercising  
6  
7 regularly (Table 1). Only the age factor (i.e., being in one's 40s) significantly differed between  
8  
9 participants with and without suicidal ideation. Six out of the eight symptoms of MDD  
10  
11 (depressive mood, loss of interest, weight loss, psychomotor agitation, worthlessness, and  
12  
13 concentration loss) were related to suicidal ideation in both the crude and adjusted analyses  
14  
15 (Table 2).  
16  
17  
18  
19

20 Depressive mood had the strongest relationship to suicidal ideation (OR 11.2, 95% CI  
21  
22 [5.4, 23.0]), followed by worthlessness (OR 8.5, 95% CI [4.1, 17.4]) and then concentration loss  
23  
24 (OR 6.1, 95% CI [4.1, 17.4]).  
25  
26

27 Worthlessness had the highest AUC (0.73, 95% CI [0.71, 0.76]) in predicting suicidal  
28  
29 ideation, followed by concentration loss (0.71, 95% CI [0.62, 0.79]) and then depressive mood  
30  
31 (0.69, 95% CI [0.66, 0.71]).  
32  
33  
34

## 35 Discussion

36  
37 Our study revealed that the prevalence of suicidal ideation was 2.7% in Japanese workers.  
38  
39 In addition, we found that six symptoms of depression, particularly depressive mood,  
40  
41 worthlessness, and concentration loss, were related to suicidal ideation. These are potential  
42  
43 predictors that can be used in identifying suicidal ideation among Japanese workers. As we  
44  
45 expected, suicidal ideation was less prevalent in Japanese workers than in Western populations<sup>16</sup>.  
46  
47 We may have to consider that this low prevalence of suicidal ideation is not reflective of a low  
48  
49 prevalence in the general population, because some Japanese people are reluctant to speak about  
50  
51 their mental condition. While we will need to reconsider this prevalence rate in the near future,  
52  
53 this rate is useful as one of the first evaluations of suicidal ideation among workers in Japan,  
54  
55  
56  
57  
58  
59  
60



1  
2  
3 which has one of the highest rates of completed suicide worldwide.  
4

5 Although there is no way to predict who will eventually die by suicide, treating the clear  
6 warning signs for suicide can reduce patients' suffering. This study revealed a significantly  
7 positive association between some symptoms of depression and suicidal ideation. In countries  
8 like Japan, where people are reluctant to express their feelings, these symptoms might be useful  
9 in estimating an individual's risk of suicidal ideation and eventual suicide<sup>4,16</sup>.  
10  
11  
12  
13  
14  
15  
16

17 Some of the above symptoms (depressive mood, worthlessness, and concentration loss)  
18 are similar to symptoms found to be predictors of suicidal ideation in previous studies<sup>16,17</sup>. Only  
19 concentration loss was a new predictor, which might be due to the characteristics of our study  
20 sample. For workers, concentration loss would be a particularly salient symptom due to its  
21 interruption of their daily work.  
22  
23  
24  
25  
26  
27  
28

29 Our results also showed that while participants who were between 40 and 49 years old,  
30 drinkers, and not exercising regularly had a higher tendency for suicidal ideation, only being in  
31 one's 40s was statistically significant in this study. This finding would be reasonable because the  
32 greatest increase in the number of deaths by suicide in the last decade in Japan occurred among  
33 40–49-year-old workers<sup>3</sup>. Although not statistically significant, heavy drinking has been shown  
34 to be associated with a higher risk of alcohol abuse, and not exercising regularly is associated  
35 with a greater risk of poor mental health<sup>1</sup>. We believe that **completed suicides have a**  
36 **background of suicidal ideation.** Thus, our recommended strategy to reduce suicide based on  
37 this research is to identify its potential risk by asking indirect questions related to suicidal  
38 ideation, including questions related to depressive mood, worthlessness, and concentration loss,  
39 because these symptoms appear to be related to the presence of suicidal ideation, which in turn  
40 increases the likelihood of completed suicide.  
41  
42  
43  
44  
45  
46  
47  
48  
49  
50  
51  
52  
53  
54  
55  
56  
57  
58  
59  
60

1  
2  
3  
4  
5  
6  
7  
8  
9  
10  
11  
12  
13  
14  
15  
16  
17  
18  
19  
20  
21  
22  
23  
24  
25  
26  
27  
28  
29  
30  
31  
32  
33  
34  
35  
36  
37  
38  
39  
40  
41  
42  
43  
44  
45  
46  
47  
48  
49  
50  
51  
52  
53  
54  
55  
56  
57  
58  
59  
60

Several limitations of this study warrant consideration. First, because of its cross-sectional nature, our results do not directly imply that symptoms of MDD and suicidal ideation are part of a clinical continuum, but rather that a simple statistical association exists after adjusting for important confounding factors. **To confirm the results, a more robust study such as prospective cohort study would be needed.** Second, because of the small sample size, the results do not directly represent the general population of Japanese workers. **The study is only applicable to a working population in an urban area in Japan.** However, this is one of the first studies to report the prevalence of suicidal ideation in Japanese workers. Thus, this report could be of paramount importance in Japan, where many people are reluctant to discuss their mental condition.

### Acknowledgements

This research was supported in part by Grant-in-Aid for Scientific Research (2009-2012) (C) from the Ministry of Education, Science, Sports and Culture, Japan; and Research Grant (2011-2014) for Health and Welfare from Ministry of Health, Labour and Welfare, Japan (No. 24590761).

### Data sharing statements

There is no additional data available.

## References

1. World Health Organization. Suicide rates per 100,000 by country, year and sex. 2011.  
[http://www.who.int/mental\\_health/prevention/suicide\\_rates/en/](http://www.who.int/mental_health/prevention/suicide_rates/en/) (accessed 12 January 2013)
2. **Nakao M**, Takeuchi T. The suicide epidemic in Japan and strategies of depression screening for its prevention. *Bull World Health Organ* 2006;**84**:492–493.
3. National Police Agency. Japan's suicide statistics in 2010.  
<http://www.npa.go.jp/safetylife/seianki/H22jisatsunogaiyou.pdf> (accessed 14 July 2013)
4. **Mcdowell AK**, Lineberry TW, Bostwick JM. Practical suicide-risk management for the busy primary care physician. *Mayo Clin Proc* 2011;**86**:792–800.
5. **Zhang Y**, Law CK, Yip PS. Psychological factors associated with the incidence and persistence of suicidal ideation. *J Affect Disord* 2011;**133**:584–590.
6. American Psychiatric Association. Practice guidelines for the treatment of psychiatric disorders compendium 2004. Tokyo, Japan: Igaku Shoin 2006: 1–966.
7. **Nakao M**, Yamanaka G, Kuboki T. Suicidal ideation and somatic symptoms of patients with mind/body distress in a Japanese psychosomatic clinic. *Suicide Life Threat Behav* 2002;**32**:80–90.
8. **Takeuchi T**, Nakao M, Yano E. Screening for major depression in the workplace: testing diagnostic accuracy of a two-item questionnaire used during mandatory testing. *Prim Care Community Psychiatr* 2006;**11**:13-19.
9. **Kessler RC**, Borgers G, Walters EE. Prevalence of and risk factors for lifetime suicide attempts in the National Comorbidity Survey. *Arch Gen Psychiatry* 1999;**56**:617–626.
10. **Suominen K**, Isometsä E, Suokas J, *et al*. Completed suicide after a suicide attempt: A 37-year follow-up study. *Am J Psychiatry* 2004;**161**:562–563.

- 1  
2  
3  
4  
5  
6  
7  
8  
9  
10  
11  
12  
13  
14  
15  
16  
17  
18  
19  
20  
21  
22  
23  
24  
25  
26  
27  
28  
29  
30  
31  
32  
33  
34  
35  
36  
37  
38  
39  
40  
41  
42  
43  
44  
45  
46  
47  
48  
49  
50  
51  
52  
53  
54  
55  
56  
57  
58  
59  
60
11. **ten Have M**, De Graaf R, van Dorsselaer S, *et al*. Incidence and course of suicidal ideation and suicide attempts in the general population. *Can J Psychiatry* 2009;**54**:824–833.
  12. **Kleinman, A**. Neurasthenia and depression: A study of somatization and culture in China. *Cult Med Psychiatry* 1982;**6**:117–190.
  13. **Simon G**, Von Korff M, Piccinelli M, *et al*. An international study of the relation between somatic symptoms and depression. *N Engl J Med* 1999;**341**:1329–1335.
  14. **American Psychiatric Association. DSM-IV-TR. Diagnostic and statistical manual of mental disorders. 4th ed., revised. Washington, DC, 2000.**
  15. **Nakao M**, Yano E. Prediction of major depression in Japanese adults: Somatic manifestation of depression in annual health examinations. *J Affect Disord* 2006;**90**:29–35.
  16. **van Gastel A**, Schotte C, Maes M. The prediction of suicidal intent in depressed patients. *Acta Psychiatr Scand* 1997;**96**:254–259.
  17. **Hawton K**, van Heeringen K. Suicide. *Lancet* 2009;**18**:1372–1381.

Table 1

*Prevalence of suicide ideation and sociodemographic characteristics of individuals with and without suicide ideation (N = 1266)*

| Variable                   | Suicidal ideation<br>+ (n = 34) |              | Suicidal ideation<br>- (n = 1232) |              | OR  | 95% CI      |
|----------------------------|---------------------------------|--------------|-----------------------------------|--------------|-----|-------------|
|                            | %                               | 95% CI       | %                                 | 95% CI       |     |             |
| Sex                        |                                 |              |                                   |              |     |             |
| Male                       | 79.4                            | [62.1, 91.3] | 87.1                              | [85.1, 88.9] | 0.6 | [0.2, 1.3]  |
| Female                     | 21.6                            | [8.7, 37.9]  | 12.9                              | [11.1, 14.9] | 1.0 | [1.0, 1.0]  |
| Age                        |                                 |              |                                   |              |     |             |
| 20–29                      | 14.7                            | [2.6, 26.8]  | 9.3                               | [7.6, 10.9]  | 1.6 | [1.0, 2.5]  |
| 30–39                      | 26.5                            | [11.4, 41.5] | 29.9                              | [27.3, 32.4] | 1.5 | [0.8, 2.8]  |
| 40–49                      | 47.1                            | [30.0, 64.1] | 29.9                              | [27.3, 32.4] | 4.2 | [1.4, 12.5] |
| 50+                        | 11.7                            | [0.4, 23.2]  | 30.9                              | [28.4, 33.6] | 1.0 | [1.0, 1.0]  |
| Smoking status             |                                 |              |                                   |              |     |             |
| Current                    | 38.2                            | [21.6, 54.8] | 36.4                              | [33.6, 39.1] | 1.0 | [0.7, 1.5]  |
| Past                       | 26.5                            | [11.4, 41.5] | 31.0                              | [28.4, 33.6] | 0.8 | [0.3, 1.9]  |
| Never                      | 35.3                            | [19.0, 51.6] | 32.6                              | [30.0, 35.3] | 1.0 | [1.0, 1.0]  |
| Alcohol consumption        |                                 |              |                                   |              |     |             |
| Every day (6–7 times/week) | 29.4                            | [13.9, 45.0] | 18.8                              | [16.6, 20.9] | 0.7 | [0.4, 1.1]  |
| Often (1–5 times/week)     | 47.1                            | [30.0, 64.1] | 46.5                              | [43.7, 49.3] | 0.6 | [0.3, 1.4]  |
| No regular drinking        | 23.5                            | [9.0, 38.0]  | 34.7                              | [32.1, 37.4] | 1.0 | [1.0, 1.0]  |
| Exercise                   |                                 |              |                                   |              |     |             |
| Irregular                  | 70.6                            | [52.5, 84.9] | 62.1                              | [59.3, 64.8] | 1.5 | [0.7, 3.1]  |
| Regular                    | 29.4                            | [15.1, 47.5] | 37.9                              | [35.2, 40.7] | 1.0 | [1.0, 1.0]  |

Table 2. Association of MDD symptoms with suicidal ideation (N = 1266)

| MDD symptoms              | Suicidal ideation (n = 34) |                            |                 |                         |                 |                         |                 |                  |                  |                   |
|---------------------------|----------------------------|----------------------------|-----------------|-------------------------|-----------------|-------------------------|-----------------|------------------|------------------|-------------------|
|                           | n (%)                      | Model 1*<br>(Non-adjusted) |                 | Model 2†<br>(Adjusted)  |                 | Model 3‡<br>(Adjusted)  |                 | Sensitivity<br>% | Specificity<br>% | AUC<br>(95% CI)   |
|                           |                            | OR (95% CI)                | p value         | OR (95% CI)             | p value         | OR (95% CI)             | p value         |                  |                  |                   |
| <b>Depressive mood</b>    | 92 (7.3)                   | <b>11.8 [5.8, 24.2]</b>    | <b>&lt;0.01</b> | <b>11.5 [5.6, 23.6]</b> | <b>&lt;0.01</b> | <b>11.2 [5.4, 23.0]</b> | <b>&lt;0.01</b> | 44.1             | 93.8             | 0.69 [0.66, 0.71] |
| <b>Loss of interest</b>   | 117 (9.2)                  | <b>3.2 [1.4, 7.2]</b>      | <b>&lt;0.01</b> | <b>3.5 [1.5, 7.9]</b>   | <b>&lt;0.01</b> | <b>3.5 [1.5, 8.0]</b>   | <b>&lt;0.01</b> | 23.5             | 91.2             | 0.57 [0.55, 0.60] |
| <b>Weight loss</b>        | 48 (3.8)                   | <b>4.8 [1.8, 12.9]</b>     | <b>&lt;0.01</b> | <b>4.9 [1.8, 13.5]</b>  | <b>&lt;0.01</b> | <b>5.0 [1.8, 13.8]</b>  | <b>&lt;0.01</b> | 14.7             | 96.5             | 0.56 [0.53, 0.58] |
| Insomnia                  | 455 (35.9)                 | <b>2.0 [1.0, 4.1]</b>      | <b>0.04</b>     | 1.9 [1.0, 3.8]          | 0.07            | 1.8 [0.9, 3.7]          | 0.09            | 52.9             | 64.5             | 0.59 [0.56, 0.61] |
| Psychomotor agitation     | 741 (58.5)                 | <b>2.4 [1.1, 5.2]</b>      | <b>0.04</b>     | 2.2 [1.0, 5.0]          | 0.05            | 2.2 [1.0, 4.9]          | 0.06            | 76.5             | 42.0             | 0.59 [0.56, 0.62] |
| Fatigue                   | 920 (72.7)                 | 2.9 [1.0, 8.2]             | 0.05            | 2.6 [0.9, 7.6]          | 0.07            | 2.6 [0.9, 7.5]          | 0.08            | 61.8             | 84.7             | 0.58 [0.55, 0.61] |
| <b>Worthlessness</b>      | 210 (16.6)                 | <b>8.9 [4.4, 18.1]</b>     | <b>&lt;0.01</b> | <b>8.6 [4.2, 17.5]</b>  | <b>&lt;0.01</b> | <b>8.5 [4.1, 17.4]</b>  | <b>&lt;0.01</b> | 61.8             | 84.7             | 0.73 [0.71, 0.76] |
| <b>Concentration loss</b> | 274 (21.6)                 | <b>6.3 [3.1, 12.7]</b>     | <b>&lt;0.01</b> | <b>6.3 [3.1, 12.8]</b>  | <b>&lt;0.01</b> | <b>6.1 [3.0, 12.5]</b>  | <b>&lt;0.01</b> | 61.8             | 79.5             | 0.71 [0.62, 0.79] |

\*Model 1 was the crude analysis. †Model 2 was adjusted for sex and age (used as categorical variables). ‡Model 3 was adjusted for sex, age (used as categorical variables), and lifestyle factors (smoking status, alcohol consumption, and exercise).

*Revised Report*

October 8, 2013

Manuscript ID bmjopen-2013-003643

Title: The Relationship Between Suicidal Ideation and Symptoms of Depression in Japan

Dear Mr. Richard Sands and the reviewers (Mr. Arup Dhar and Ms. Toffol Elena),

Thank you for reviewing our manuscript. We are in receipt of your kind letter related to the publication of our manuscript, “The Relationship Between Suicidal Ideation and Symptoms of Depression in Japan” in *BMJ Open*. We revised our manuscript following the reviews. *Italic* parts are the reviewers’ comments and following **bold** parts are revised points in detail, and the altered parts are also **bolded** in the revised manuscript.

*Managing editor's comment: please include the study design type in the study title.*

**General response to the managing editor:** We really appreciate you being engaged in our paper’s revising process.

**Response:** Thank you for your comment. We have changed the title to “**The Relationship between Suicidal Ideation and Symptoms of Depression in Japanese Workers: A Cross sectional Study.**”

1  
2  
3  
4  
5  
6  
7  
8  
9  
10  
11  
12  
13  
14  
15  
16  
17  
18  
19  
20  
21  
22  
23  
24  
25  
26  
27  
28  
29  
30  
31  
32  
33  
34  
35  
36  
37  
38  
39  
40  
41  
42  
43  
44  
45  
46  
47  
48  
49  
50  
51  
52  
53  
54  
55  
56  
57  
58  
59  
60

*Reviewer: Arup Dhar*

*(Qu1) Suggest title of paper includes the term 'Japanese workers' as opposed to simply 'Japan', as the title in its current format is misleading.*

**General response to Mr. Arup Dhar:** We really appreciate you being engaged in our paper's revising process.

**Response:** Thank you for your comment. We have changed the title to “**The Relationship between Suicidal Ideation and Symptoms of Depression in Japanese Workers: A Cross sectional Study**” in order not to be misleading.

*(Qu2) Address limitations further eg why standardised interviews were not used eg Mini International Neuropsychiatry Interview. Was there was any inter rater reliability training sessions carried out?*

**Response:** Thanks for your valuable comment. As we mentioned in the introduction section, the question of suicide in Japanese workers is a kind of taboo, so it was difficult to use MINI for asking about suicide (six questions). Instead, we limited our question to suicidal ideation.

Interviewers' diagnoses were sufficiently consistent. Two physicians, who specialize in both psychiatry and psychosomatic medicine, checked the consistency of their diagnoses for 20 cases according to the axis I classification of disorders, including MDD (the 20 cases were presented by a professor not related to this study). Out of the 20 cases, 14 were diagnosed similarly by the two physicians (the kappa statistics was 0.94).



1  
2  
3  
4  
5  
6  
7  
8  
9  
10  
11  
12  
13  
14  
15  
16  
17  
18  
19  
20  
21  
22  
23  
24  
25  
26  
27  
28  
29  
30  
31  
32  
33  
34  
35  
36  
37  
38  
39  
40  
41  
42  
43  
44  
45  
46  
47  
48  
49  
50  
51  
52  
53  
54  
55  
56  
57  
58  
59  
60

*Reviewer: Toffol, Elena*

*This paper reports the prevalence of MDD and suicidal ideation in a sample of 1266 Japanese workers; additionally, it describes the association between suicidal ideation and specific depressive symptoms in the above-mentioned population. Even though the work is overall well-built, I think some limitations need to be addressed.*

**General response to Ms. Toffol Elena:** We really appreciate you being engaged in our paper's revising process.

*My major comment concerns the overall aim of the study. I understand the authors' position that suicidal ideation is a taboo in many cultures, and that it may be difficult to assess on a general screening level. However, I would not spread the message that investigating depressive symptoms may be an alternative to assessing suicidal ideation. I would rather claim that assessing specific depressive symptoms, known to be related to suicidal ideation, is an important addition, possibly a preliminary step in the more specific and direct evaluation of suicidal ideation. Also, the authors found significant associations between suicidal ideation and some specific depressive symptoms (depressive mood, worthlessness and concentration loss): is this really a novel finding? In other words, how much these associations are rather expression of all being part of the same diagnostic group?*

**Response:** Thanks for your kind and concrete comments. We would like to say that assessing specific depressive symptoms in occupational fields is an important addition. Our research was based on the occupational field, not the clinical field. That is the main novelty of our paper. Clinically, the relationship between suicide and depression has been researched by many previous studies. However, studies which have mentioned this relationship in the occupational field has been few. Our investigation therefore is important as an occupational field study. To clarify our study's originality, we have changed the title to "**The Relationship between Suicidal Ideation and Symptoms of Depression in Japanese Workers: A Cross sectional Study**" in order not to be misleading.

*The idea of detecting possible predictors and indirect signs of suicidal ideation is interesting, but I think a more robust design (e.g. a longitudinal one) would be needed. I would at least address these points in the limitations.*

1  
2  
3  
4  
5 **Response:** Following the reviewers comments, we added the following sentence in the  
6 limitation section, **“To confirm the results, a more robust study such as prospective**  
7 **cohort study would be needed”**(Page 10, lines 4-5).  
8  
9

10  
11 *Also, the authors state that Japanese workers may be reluctant to report suicidal*  
12 *ideation: thus, is it possible that those who are classified as non-ideators in this study,*  
13 *in fact have themselves suicidal ideation? Could this have biased the results?*

14  
15 **Response:** There is a possibility that reluctance in Japanese respondents may cause bias,  
16 this however tends to produce estimates of the effect that are diluted, or closer to the  
17 null or no-effect value than the actual effect. Therefore, the result itself is plausible.  
18  
19

20  
21 *Other minor considerations are reported below:*

22  
23 *1. in general: a language revision is needed. Some sentences were not very clear to me.*  
24 *E.g.: introduction, page 4, line 15 “however; outcome has yet been observed clearly”;*  
25 *discussion, page 9, line 48 “completed suicides are likely to have a background of*  
26 *suicidal ideation”.*  
27

28  
29 **Response:** To make the meaning more clearly, we change the sentence to “however the  
30 suicide rate in Japan has not decreased (page 4, lines 5-6)” and “completed suicides  
31 have a background of suicidal ideation (page 9, line 18-19).”  
32  
33

34  
35 *2. abstract: what does “the prevalence and potential for suicidal ideation ....” mean? In*  
36 *the abstract the authors mention a previous study of theirs: the readers may not be*  
37 *familiar with this study, I would add some more information here (psychiatric patients?*  
38 *any patients?; also, I would suggest reporting the prevalence rate: e.g. “...although a*  
39 *previous study reported a XXX prevalence rate of suicide in XXX”).*  
40  
41

42  
43 **Response:** Following the reviewer’s comments, we changed the sentence in abstract to  
44 “The prevalence of **suicidal ideation** and **predictors** for suicidal ideation among  
45 Japanese workers is unknown, **although a previous study reported a 30 %**  
46 **prevalence rate of suicide in a psychosomatic clinical setting.”**  
47  
48

49  
50 *3. introduction, page 4, line 18: what are the “collaborative care models”? I would*  
51 *briefly mention what a collaborative care model consists of.*

52  
53 **Response:** We added the following words, “collaborative care, **that is, structured care**  
54 **involving a greater role of nonmedical specialists** for treating depression.....”(page 4,  
55 Lines7-8)  
56  
57  
58  
59  
60

1  
2  
3  
4  
5  
6  
7 4. introduction, page 4, beginning of paragraph 3: I would reformulate this first  
8 sentence. Again I would be careful in claiming that instead of investigating depression,  
9 we could simply investigate suicidal ideation (besides, this is somehow contradictory  
10 with the general aim of study). I would rather say that “in addition to...”. Similarly, I  
11 would reformulate the sentence at page 5, lines 20-22: “Therefore, instead of  
12 identifying suicidal ideation....” This should also be pointed out in the discussion.

13  
14  
15 **Response:** Following the reviewer’s comments, we changed the sentence “**In addition**  
16 **to investigating.....**(page 4 line 14)”, “**we try to identify both suicidal ideation**  
17 **and the symptoms closely related to suicidal ideation in determining an**  
18 **individual’s risk of suicide**”(page 5 lines 8-9).  
19  
20  
21

22  
23 5. Introduction, page 49-51: the authors refer to a previous study of theirs. I would  
24 suggest reporting here the prevalence rate of suicidal ideation found in the study; also,  
25 in which kind of clinics was the study conduct? Psychiatric clinics? Any clinics?  
26

27 **Response:** Same as the abstract part, we added the following sentence in the  
28 introduction, “Our previous study reported the prevalence of suicidal ideation (**30%**) in  
29 **a psychosomatic clinical setting**<sup>7</sup>” (page 4, line 21).  
30  
31  
32

33 6. Introduction, page 5, line 25: the authors state that “more than 30000 people have  
34 committed suicide each year for the past 10 years”. Suicidal rates would be more  
35 informative.  
36

37 **Response:** We have added “**25 per 100,000 people**” after the 30000 people (page 5  
38 Line 10)  
39  
40

41  
42 7. Methods: one concern is about the representativeness of the study population.  
43 Participants were over 1000 office-worker in an enterprise in Tokyo. I would say that  
44 this is a quite selected population. How about workers in other sectors (e.g. physically  
45 demanding jobs) or in other areas (e.g. rural areas)? Also, though a big number, I  
46 would assume that 1000 people is a rather small proportion of the Japanese population.  
47 I would acknowledge this more in detail in the limitations. Also, I am wondering about  
48 the gender disproportion in the sample (13% women): could this have influenced the  
49 results? Women are known to be more likely to suffer from depression, and suicidal  
50 ideation is one of the diagnostic criteria for MDD.  
51  
52

53 **Response:** Thank you for your comments. As we mentioned in the limitation, our data  
54 can only apply to the working population in urban working places. We have mentioned  
55  
56  
57  
58  
59  
60

1  
2  
3  
4  
5  
6  
7  
8  
9  
10  
11  
12  
13  
14  
15  
16  
17  
18  
19  
20  
21  
22  
23  
24  
25  
26  
27  
28  
29  
30  
31  
32  
33  
34  
35  
36  
37  
38  
39  
40  
41  
42  
43  
44  
45  
46  
47  
48  
49  
50  
51  
52  
53  
54  
55  
56  
57  
58  
59  
60

this in the discussion section as follows. “**The study is only applicable to a working population in an urban area in Japan.**” (page 10, lines 6–7).

As the reviewer has mentioned, our sample size was relatively small. However, a small sample size does not mean that the correlation is unsure. If we observe a statistically significant difference in a small sample, it actually implies that the result is robust, because it would be easier to achieve statistical significance with a large number of subjects. However, there is definitely a possibility that our sample does not represent the general population. We have thus added the before mentioned sentence in the limitation section.

The fact that low number of women reflects Japanese women's low participation in the workplace. Now, a national project to enhance the entrance of women into the workforce is undergoing. Statistically no significant differences were observed in the results of the analysis before and after the adjustment by sex in table 2, therefore sex difference does not have a significant influence on the results.

*8. Methods, Assessment of major depressive disorder including suicidal ideation: which clinical interview was used to assess MDD? And how was suicidal ideation evaluated? Is suicidal ideation a “diagnosis”?*

**Response:** We evaluated MDD and suicidal ideation independently. To diagnose MDD, the semi-structured clinical interview (Structured Clinical Interview for DSM-IV for axis I disorders: SCID-CV) was used. To diagnose suicidal ideation, Y/N questions about suicidal ideation were used in the following interview of SCID. Suicidal ideation was a kind of diagnosis on Y/N questions. No discrepancy was observed between suicide question of MDD and Y/N suicidal questions.

*9. Methods, Assessment of lifestyle factors: how were sleep disturbances evaluated?*

**Response:** Three types of insomnia symptoms from the previous month were assessed using the following questions: “Do you have difficulty falling asleep at night?” (difficulty in initiating sleep), “Do you wake up during the night after you have gone to sleep?” (difficulty in maintaining sleep), and “Do you wake up too early in the morning and have difficulty getting back to sleep?” (early morning awakening). These questions were adopted from our previous studies (Nomura K, Yamaoka K, Nakao M, Yano E. 2005. Sleep. Nomura K, Nakao M, Takeuchi T, Yano E. 2009. Sleep Med), and the answers were confirmed by 2 male physicians specializing in psychiatry according to the DSM-IV-TR definition of insomnia. However these results had not included the results. We deleted these parts totally in the method section. Thanks again.

1  
2  
3  
4  
5  
6  
7 *10. Methods, Statistical analyses: the authors state that “logistic regression analyses*  
8 *were used to evaluate the association between suicidal ideation and MDD”: is this*  
9 *correct? Or did they study the associations with each MDD symptom?*

10  
11 **Response:** Thank you for finding our mistake. That was a typo. We changed the phrase  
12 to “suicidal ideation and **each MDD symptom**”(page 7, line 11).  
13

14  
15  
16 *11. Results: the results reported in the first paragraph are not completely clear: the*  
17 *authors say that “those with suicidal ideation were more likely to be women”, but in*  
18 *fact 21.6% only are women. I assume the authors refer to the comparison with*  
19 *individuals without suicidal ideation (women 21.6% vs. 12.9%), but as it is reported*  
20 *now, is somehow confusing.*

21  
22 **Response:** Yes. That was confusing. We deleted the sex difference sentences in both  
23 results and discussion.  
24  
25

26  
27 *12. Results and Table 1: the authors report that, compared with non ideators, those with*  
28 *suicidal ideation were more likely to be in the age group 40-49 years. Also those in the*  
29 *age group 20-29 were more likely to report suicidal ideation.*

30  
31 **Response:** That might be true. However 95%CI of age 20 to 29 included 1.0, it means it  
32 was not statistically significant. Therefore, we did not include that age group.  
33  
34

35  
36 *13. Table 1: in the methods the authors mention the assessment of sleep disturbances*  
37 *and anxiety, but then they do not report any results about sleep disturbances and anxiety.*  
38 *These results should be reported at least in the table (otherwise, please remove the*  
39 *description from the methods section).*

40  
41 **Response:** Thanks for your check. We totally deleted assessment of sleep disturbance  
42 and anxiety in the method.  
43  
44

45  
46 *14. Table 2 would be clearer if the significant items and ORs were somehow*  
47 *highlighted; I would also like to see the p-values in the Table.*

48  
49 **Response:** We highlighted (**bolded**) significant items and ORs with p-values in table2.  
50  
51  
52  
53  
54  
55  
56  
57  
58  
59  
60

We checked and confirmed that the following items are included in our manuscript.

Takeaki Takeuchi 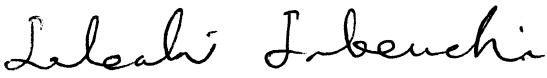 Oct 9

Mutsuhiro Nakao  Oct 9

STROBE Statement—checklist of items that should be included in reports of observational studies

|                              | Item No | Recommendation                                                                                                                                                                                                                                                                                                                                                                                                                                                                                                                                                                                                                                                                                   |
|------------------------------|---------|--------------------------------------------------------------------------------------------------------------------------------------------------------------------------------------------------------------------------------------------------------------------------------------------------------------------------------------------------------------------------------------------------------------------------------------------------------------------------------------------------------------------------------------------------------------------------------------------------------------------------------------------------------------------------------------------------|
| <b>Title and abstract</b>    | 1       | (a) Indicate the study's design with a commonly used term in the title or the abstract<br>(b) Provide in the abstract an informative and balanced summary of what was done and what was found                                                                                                                                                                                                                                                                                                                                                                                                                                                                                                    |
| <b>Introduction</b>          |         |                                                                                                                                                                                                                                                                                                                                                                                                                                                                                                                                                                                                                                                                                                  |
| Background/rationale         | 2       | Explain the scientific background and rationale for the investigation being reported                                                                                                                                                                                                                                                                                                                                                                                                                                                                                                                                                                                                             |
| Objectives                   | 3       | State specific objectives, including any prespecified hypotheses                                                                                                                                                                                                                                                                                                                                                                                                                                                                                                                                                                                                                                 |
| <b>Methods</b>               |         |                                                                                                                                                                                                                                                                                                                                                                                                                                                                                                                                                                                                                                                                                                  |
| Study design                 | 4       | Present key elements of study design early in the paper                                                                                                                                                                                                                                                                                                                                                                                                                                                                                                                                                                                                                                          |
| Setting                      | 5       | Describe the setting, locations, and relevant dates, including periods of recruitment, exposure, follow-up, and data collection                                                                                                                                                                                                                                                                                                                                                                                                                                                                                                                                                                  |
| Participants                 | 6       | (a) <i>Cohort study</i> —Give the eligibility criteria, and the sources and methods of selection of participants. Describe methods of follow-up<br><i>Case-control study</i> —Give the eligibility criteria, and the sources and methods of case ascertainment and control selection. Give the rationale for the choice of cases and controls<br><i>Cross-sectional study</i> —Give the eligibility criteria, and the sources and methods of selection of participants<br>(b) <i>Cohort study</i> —For matched studies, give matching criteria and number of exposed and unexposed<br><i>Case-control study</i> —For matched studies, give matching criteria and the number of controls per case |
| Variables                    | 7       | Clearly define all outcomes, exposures, predictors, potential confounders, and effect modifiers. Give diagnostic criteria, if applicable                                                                                                                                                                                                                                                                                                                                                                                                                                                                                                                                                         |
| Data sources/<br>measurement | 8*      | For each variable of interest, give sources of data and details of methods of assessment (measurement). Describe comparability of assessment methods if there is more than one group                                                                                                                                                                                                                                                                                                                                                                                                                                                                                                             |
| Bias                         | 9       | Describe any efforts to address potential sources of bias                                                                                                                                                                                                                                                                                                                                                                                                                                                                                                                                                                                                                                        |
| Study size                   | 10      | Explain how the study size was arrived at                                                                                                                                                                                                                                                                                                                                                                                                                                                                                                                                                                                                                                                        |
| Quantitative variables       | 11      | Explain how quantitative variables were handled in the analyses. If applicable, describe which groupings were chosen and why                                                                                                                                                                                                                                                                                                                                                                                                                                                                                                                                                                     |
| Statistical methods          | 12      | (a) Describe all statistical methods, including those used to control for confounding<br>(b) Describe any methods used to examine subgroups and interactions<br>(c) Explain how missing data were addressed<br>(d) <i>Cohort study</i> —If applicable, explain how loss to follow-up was addressed<br><i>Case-control study</i> —If applicable, explain how matching of cases and controls was addressed                                                                                                                                                                                                                                                                                         |



| <b>Results</b>           |     |                                                                                                                                                                                                                                                                                                                                                                                                               |
|--------------------------|-----|---------------------------------------------------------------------------------------------------------------------------------------------------------------------------------------------------------------------------------------------------------------------------------------------------------------------------------------------------------------------------------------------------------------|
| Participants             | 13* | (a) Report numbers of individuals at each stage of study—eg numbers potentially eligible, examined for eligibility, confirmed eligible, included in the study, completing follow-up, and analysed<br>(b) Give reasons for non-participation at each stage<br>(c) Consider use of a flow diagram                                                                                                               |
| Descriptive data         | 14* | (a) Give characteristics of study participants (eg demographic, clinical, social) and information on exposures and potential confounders<br>(b) Indicate number of participants with missing data for each variable of interest<br>(c) <i>Cohort study</i> —Summarise follow-up time (eg, average and total amount)                                                                                           |
| Outcome data             | 15* | <i>Cohort study</i> —Report numbers of outcome events or summary measures over time<br><i>Case-control study</i> —Report numbers in each exposure category, or summary measures of exposure<br><i>Cross-sectional study</i> —Report numbers of outcome events or summary measures                                                                                                                             |
| Main results             | 16  | (a) Give unadjusted estimates and, if applicable, confounder-adjusted estimates and their precision (eg, 95% confidence interval). Make clear which confounders were adjusted for and why they were included<br>(b) Report category boundaries when continuous variables were categorized<br>(c) If relevant, consider translating estimates of relative risk into absolute risk for a meaningful time period |
| Other analyses           | 17  | Report other analyses done—eg analyses of subgroups and interactions, and sensitivity analyses                                                                                                                                                                                                                                                                                                                |
| <b>Discussion</b>        |     |                                                                                                                                                                                                                                                                                                                                                                                                               |
| Key results              | 18  | Summarise key results with reference to study objectives                                                                                                                                                                                                                                                                                                                                                      |
| Limitations              | 19  | Discuss limitations of the study, taking into account sources of potential bias or imprecision. Discuss both direction and magnitude of any potential bias                                                                                                                                                                                                                                                    |
| Interpretation           | 20  | Give a cautious overall interpretation of results considering objectives, limitations, multiplicity of analyses, results from similar studies, and other relevant evidence                                                                                                                                                                                                                                    |
| Generalisability         | 21  | Discuss the generalisability (external validity) of the study results                                                                                                                                                                                                                                                                                                                                         |
| <b>Other information</b> |     |                                                                                                                                                                                                                                                                                                                                                                                                               |
| Funding                  | 22  | Give the source of funding and the role of the funders for the present study and, if applicable, for the original study on which the present article is based                                                                                                                                                                                                                                                 |

\*Give information separately for cases and controls in case-control studies and, if applicable, for exposed and unexposed groups in cohort and cross-sectional studies.

**Note:** An Explanation and Elaboration article discusses each checklist item and gives methodological background and published examples of transparent reporting. The STROBE checklist is best used in conjunction with this article (freely available on the Web sites of PLoS Medicine at <http://www.plosmedicine.org/>, Annals of Internal Medicine at <http://www.annals.org/>, and Epidemiology at <http://www.epidem.com/>). Information on the STROBE Initiative is available at [www.strobe-statement.org](http://www.strobe-statement.org).



1  
2  
3 **The Relationship between Suicidal Ideation and Symptoms of Depression in Japanese**  
4 **Workers: A Cross sectional Study**  
5  
6  
7

8  
9 Takeaki Takeuchi<sup>1)</sup>  
10

11 Mutsuhiro Nakao<sup>1)</sup>  
12  
13

- 14  
15  
16 1. Department of Hygiene and Public Health and Division of Psychosomatic Medicine, Teikyo  
17  
18 University School of Medicine, Tokyo, Japan  
19  
20

21  
22  
23  
24  
25  
26 Correspondence concerning this article should be addressed to Takeaki Takeuchi, Department of  
27  
28 Hygiene and Public Health, Teikyo University School of Medicine 2-11-1 Kaga, Itabashi, Tokyo  
29  
30 173-8605 Japan.  
31

32  
33 E-mail: takeakij@post.harvard.edu  
34

35 Word Count: 1867  
36

37 Number of tables: 2  
38

39  
40 *Keywords:* Japan; Major depressive disorder; Suicidal ideation; Workers  
41  
42  
43  
44  
45  
46  
47  
48  
49  
50  
51  
52  
53  
54  
55  
56  
57  
58  
59  
60

## Abstract

**Objectives:** The prevalence of **suicidal ideation** and **predictors** for suicidal ideation among Japanese workers is unknown, **although a previous study reported a 30 % prevalence rate of suicide in a psychosomatic clinical setting.** Hence, we evaluated the prevalence of suicidal ideation and its relationship with depressive symptoms among Japanese workers.

**Methods:** For this purpose, a cross-sectional design was used. Major depressive disorder (MDD) and suicidal ideation in 1,266 workers (1100 men and 166 women, aged 20–69 years) were assessed through clinical interviews conducted in accordance with the fourth edition of the Diagnostic and Statistical Manual of Mental Disorders.

**Results:** A total of 34 and 70 participants were diagnosed with suicidal ideation and MDD, respectively. Suicidal ideation was especially prevalent in 40–49-year-olds. Six out of the eight symptoms of MDD (depressive mood, loss of interest, weight loss, psychomotor agitation, worthlessness, and concentration loss) were related to suicidal ideation. Depressive mood had the strongest relationship with suicidal ideation, followed by worthlessness and concentration loss. Worthlessness had the highest area under the curve in predicting suicidal ideation, followed by concentration loss and depressive mood.

**Conclusions:** We conclude that MDD symptoms—particularly depressive mood, worthlessness, and concentration loss—are potential predictors of suicidal ideation in Japanese workers.

### Article focus

- To determine the prevalence of suicidal ideation in Japanese workers because of the lack of data in the working population.
- To examine the symptoms of major depressive disorder (MDD) that relate to suicidal ideation hypothesizing that these serve as possible predictors of suicide.

### Key messages

- The prevalence of suicidal ideation was 2.7% in Japanese workers.
- Six symptoms of MDD, particularly depressive mood, worthlessness and concentration loss were related to suicidal ideation.
- These seem to be potential predictors that can be used in identifying suicidal ideation among Japanese workers, treating these symptoms as clear warning signs for dealing with suicidal risk

### Strengths and limitations of this study

- This is the first evaluation of suicidal ideation among workers in Japan, which has one of the highest rates of suicide worldwide.
- Assessment of MDD including suicidal ideation were made by clinical interviews based on the Diagnostic Statistical Manual of Mental Disorders Fourth Edition, Text Revision.
- Results do not directly imply that symptoms of MDD and suicidal ideation are part of a clinical continuum because of its cross-sectional nature.
- Results do not directly represent the general population of Japanese workers because of the small sample size.

1  
2  
3 Although Japan has the highest global ranking for longevity, it also has one of the highest  
4  
5 suicide rates, being ranked 9<sup>th</sup> for men and 3<sup>rd</sup> for women in the world<sup>1</sup>. From 1995 to 1998, the  
6  
7 incidence of reported suicide rose dramatically from 17 to 25 per 100,000 people, and that high  
8  
9 rate continued even in 2010<sup>2,3</sup>. Since 2005, the Japanese Cabinet Office and the Ministry of  
10  
11 Health, Labour and Welfare have been attempting to reduce the suicide rate; **however the**  
12  
13 **suicide rate in Japan has not decreased.**  
14  
15

16  
17 To reduce the number of suicides, **collaborative care, that is, structured care involving**  
18  
19 **a greater role of nonmedical specialists for treating depression** have shown potential in both  
20  
21 improving depression outcomes and decreasing suicide risk<sup>4</sup>. However, with the exception of  
22  
23 psychiatrists or psychological specialists, most doctors find it difficult to diagnose depression  
24  
25 because of the complexities involved in administering clinical interviews. In addition, doctors  
26  
27 must pay attention to those who do not perfectly match the diagnostic criteria<sup>5</sup>. If depression is  
28  
29 not diagnosed appropriately, it might be difficult to find the pathway that leads to suicide.  
30  
31  
32

33  
34 **In addition to** investigating the potential for depression, it would be much simpler and  
35  
36 more useful to determine the presence of suicidal ideation in individuals to assess their suicide  
37  
38 risk. Suicidal ideation, which refers to wishing that one's life would end or thoughts of harming  
39  
40 or killing oneself, represents an important phase in the suicidal process and often precedes  
41  
42 suicidal attempts or death by suicide. In clinical settings, it is relatively straightforward to ask  
43  
44 patients whether they have suicidal ideation, because this is one of the most important routine  
45  
46 questions in mental health<sup>6</sup>. Our previous study reported the prevalence of suicidal ideation  
47  
48 **(30%) in a psychosomatic clinical setting**<sup>7</sup>. Naturally, attempted suicide is one of the strongest  
49  
50 risk factors for death by suicide<sup>8-11</sup>, and 60% of planned first attempts occur within the first year  
51  
52 of ideation onset<sup>9</sup>. Therefore, identifying those people with suicidal ideation would be logically  
53  
54  
55  
56  
57  
58  
59  
60

1  
2  
3 the first step in reducing the incidence of suicide.  
4

5 One problem is that, in screening process such as workplaces, it might be difficult to  
6 identify people with suicidal ideation because asking workers whether they had suicidal ideation  
7 could lead to conflicts in their relationships. In addition, people from Asian countries are  
8 sometimes reluctant to speak about their mental condition, including suicidal ideation, even to  
9 their physicians, because it is considered taboo<sup>2</sup>. The Japanese in particular are less willing to  
10 express emotional distress or feelings such as suicidal ideation compared with Westerners<sup>12,13</sup>.  
11 Therefore, **we try to identify both suicidal ideation and the symptoms closely related to**  
12 **suicidal ideation in determining an individual's risk of suicide.**  
13  
14  
15  
16  
17  
18  
19  
20  
21  
22  
23

24 In Japan, more than 30,000 people, **25 per 100,000 people**, have committed suicide each  
25 year for the past 10 years, and 27% of them were working people<sup>3</sup>. Thus, we thought that it was  
26 highly important to identify the prevalence of suicidal ideation and the symptoms that are closely  
27 related to suicidal ideation in the working population in Japan.  
28  
29  
30  
31  
32  
33

34 The aims of this study were twofold. First, we attempted to determine the prevalence of  
35 suicidal ideation in Japanese workers because of the lack of data at present on the prevalence of  
36 suicidal ideation in working population. Second, we examined the symptoms of major depressive  
37 disorder (MDD), hypothesizing that some of these symptoms would be strongly related to  
38 suicidal ideation, and thus serve as possible predictors.  
39  
40  
41  
42  
43  
44  
45  
46  
47

## 48 **Methods**

### 49 **Participants and ethical considerations**

50 A cross-sectional design was used. Data were obtained from 1,314 full-time office  
51 workers attending health examinations in an enterprise in Tokyo, Japan. Due to missing health  
52  
53  
54  
55  
56  
57  
58  
59  
60

1  
2  
3 examination data, we excluded 48 participants, and thus, we analyzed the data from 1,266  
4  
5 Japanese workers (96% of the total number of employees, 1100 men and 166 women aged 20–69  
6  
7 years). All participants provided written informed consent after receiving a complete explanation  
8  
9 regarding the purpose, nature, and risks of the procedures used. This study was performed in  
10  
11 accordance with the World Medical Association’s Declaration of Helsinki, and its protocol was  
12  
13 approved by the Ethics Committee of the Teikyo University School of Medicine and the  
14  
15 company’s labor safety committee.  
16  
17  
18

### 19 20 **Assessment of major depressive disorder including suicidal ideation**

21  
22 To ascertain whether each participant met the Diagnostic Statistical Manual of Mental  
23  
24 Disorders Fourth Edition, Text Revision (DSM-IV)<sup>14</sup> criteria for MDD, clinical interviews for  
25  
26 DSM-IV axis I disorders were conducted by two study physicians specializing in both psychiatry  
27  
28 and psychosomatic medicine, assisted by a researcher trained in psychology. Suicidal ideation  
29  
30 was also evaluated during the interviews. To confirm the diagnosis of suicidal ideation,  
31  
32 interviewees underwent additional independent interviews that specifically focused on suicidal  
33  
34 ideation.  
35  
36  
37

### 38 39 **Assessment of lifestyle factors**

40  
41 A structured questionnaire administered by the physician was used to assess lifestyle  
42  
43 factors, including smoking status, alcohol consumption, and exercise<sup>15</sup>. Based on their smoking  
44  
45 history, the subjects were classified into three categories: current smokers, past smokers, and  
46  
47 non-smokers (no history of smoking). Alcohol consumption was classified into three categories  
48  
49 based on the weekly frequency of consumption: 6–7 times/week, 1–5 times/week, and occasional  
50  
51 drinking. Exercise was classified into two categories: regular or irregular. These questions were  
52  
53 asked as additional questions during the DSM-IV interview.  
54  
55  
56  
57  
58  
59  
60

## Sample size

Based on our previous study<sup>7,8</sup>, we expected to find a difference of 30% in the rate of each symptom between both groups with and without suicidal ideation. To achieve a power of 0.90 given a two-sided  $\alpha$  of 0.05, and a ratio of our exposed sample to our control sample of 1:25, we needed at least 32 participants in the group with suicidal ideation and 800 participants without suicidal ideation. Finally, through the actual data collection we collected 34 participants with suicidal ideation and 1232 participants without suicidal ideation.

## Statistical analysis

After the characteristics of the study population were descriptively evaluated according to the presence of suicidal ideation, multiple logistic regression analyses were used to evaluate the association between suicidal ideation and **each MDD symptom**, by calculating crude and adjusted odds ratios (ORs). The ratios were adjusted for potential confounding factors to depression and suicide, such as sex, age, and three lifestyle factors (smoking status, alcohol consumption, and exercise). Finally, receiver operating curve (ROC) analyses were performed to examine the predictive potentials of MDD symptoms for suicidal ideation. Statistical significance was inferred at  $p < 0.05$  (two-tailed) for both the crude and adjusted ORs of the logistic analyses and the test equality of the area under the curve (AUC). All analyses were performed using STATA version 11.

## Results

A total of 34 (2.7%, 95% confidence interval [1.8, 3.8]) and 70 (5.5%, 95% CI [4.3, 6.8])

1  
2  
3 people were diagnosed with having suicidal ideation and MDD, respectively. Those with suicidal  
4  
5 ideation were more likely to be aged between 40 and 49 years, drinkers, and not exercising  
6  
7 regularly (Table 1). Only the age factor (i.e., being in one's 40s) significantly differed between  
8  
9 participants with and without suicidal ideation. Six out of the eight symptoms of MDD  
10  
11 (depressive mood, loss of interest, weight loss, psychomotor agitation, worthlessness, and  
12  
13 concentration loss) were related to suicidal ideation in both the crude and adjusted analyses  
14  
15 (Table 2).  
16  
17  
18  
19

20 Depressive mood had the strongest relationship to suicidal ideation (OR 11.2, 95% CI  
21  
22 [5.4, 23.0]), followed by worthlessness (OR 8.5, 95% CI [4.1, 17.4]) and then concentration loss  
23  
24 (OR 6.1, 95% CI [4.1, 17.4]).  
25  
26

27 Worthlessness had the highest AUC (0.73, 95% CI [0.71, 0.76]) in predicting suicidal  
28  
29 ideation, followed by concentration loss (0.71, 95% CI [0.62, 0.79]) and then depressive mood  
30  
31 (0.69, 95% CI [0.66, 0.71]).  
32  
33  
34

## 35 Discussion

36  
37 Our study revealed that the prevalence of suicidal ideation was 2.7% in Japanese workers.  
38  
39 In addition, we found that six symptoms of depression, particularly depressive mood,  
40  
41 worthlessness, and concentration loss, were related to suicidal ideation. These are potential  
42  
43 predictors that can be used in identifying suicidal ideation among Japanese workers. As we  
44  
45 expected, suicidal ideation was less prevalent in Japanese workers than in Western populations<sup>16</sup>.  
46  
47 We may have to consider that this low prevalence of suicidal ideation is not reflective of a low  
48  
49 prevalence in the general population, because some Japanese people are reluctant to speak about  
50  
51 their mental condition. While we will need to reconsider this prevalence rate in the near future,  
52  
53 this rate is useful as one of the first evaluations of suicidal ideation among workers in Japan,  
54  
55  
56  
57  
58  
59  
60



1  
2  
3 which has one of the highest rates of completed suicide worldwide.  
4

5 Although there is no way to predict who will eventually die by suicide, treating the clear  
6 warning signs for suicide can reduce patients' suffering. This study revealed a significantly  
7 positive association between some symptoms of depression and suicidal ideation. In countries  
8 like Japan, where people are reluctant to express their feelings, these symptoms might be useful  
9 in estimating an individual's risk of suicidal ideation and eventual suicide<sup>4,16</sup>.  
10  
11  
12  
13  
14  
15  
16

17 Some of the above symptoms (depressive mood, worthlessness, and concentration loss)  
18 are similar to symptoms found to be predictors of suicidal ideation in previous studies<sup>16,17</sup>. Only  
19 concentration loss was a new predictor, which might be due to the characteristics of our study  
20 sample. For workers, concentration loss would be a particularly salient symptom due to its  
21 interruption of their daily work.  
22  
23  
24  
25  
26  
27  
28

29 Our results also showed that while participants who were between 40 and 49 years old,  
30 drinkers, and not exercising regularly had a higher tendency for suicidal ideation, only being in  
31 one's 40s was statistically significant in this study. This finding would be reasonable because the  
32 greatest increase in the number of deaths by suicide in the last decade in Japan occurred among  
33 40–49-year-old workers<sup>3</sup>. Although not statistically significant, heavy drinking has been shown  
34 to be associated with a higher risk of alcohol abuse, and not exercising regularly is associated  
35 with a greater risk of poor mental health<sup>1</sup>. We believe that **completed suicides have a**  
36  
37  
38  
39  
40  
41  
42  
43  
44  
45  
46 **background of suicidal ideation.** Thus, our recommended strategy to reduce suicide based on  
47 this research is to identify its potential risk by asking indirect questions related to suicidal  
48 ideation, including questions related to depressive mood, worthlessness, and concentration loss,  
49 because these symptoms appear to be related to the presence of suicidal ideation, which in turn  
50 increases the likelihood of completed suicide.  
51  
52  
53  
54  
55  
56  
57  
58  
59  
60



1  
2  
3  
4  
5  
6  
7  
8  
9  
10  
11  
12  
13  
14  
15  
16  
17  
18  
19  
20  
21  
22  
23  
24  
25  
26  
27  
28  
29  
30  
31  
32  
33  
34  
35  
36  
37  
38  
39  
40  
41  
42  
43  
44  
45  
46  
47  
48  
49  
50  
51  
52  
53  
54  
55  
56  
57  
58  
59  
60

**Data sharing statements**

There is no additional data available.

For peer review only

## References

1. World Health Organization. Suicide rates per 100,000 by country, year and sex. 2011.  
[http://www.who.int/mental\\_health/prevention/suicide\\_rates/en/](http://www.who.int/mental_health/prevention/suicide_rates/en/) (accessed 12 January 2013)
2. **Nakao M**, Takeuchi T. The suicide epidemic in Japan and strategies of depression screening for its prevention. *Bull World Health Organ* 2006;**84**:492–493.
3. National Police Agency. Japan's suicide statistics in 2010.  
<http://www.npa.go.jp/safetylife/seianki/H22jisatsunogaiyou.pdf> (accessed 14 July 2013)
4. **Mcdowell AK**, Lineberry TW, Bostwick JM. Practical suicide-risk management for the busy primary care physician. *Mayo Clin Proc* 2011;**86**:792–800.
5. **Zhang Y**, Law CK, Yip PS. Psychological factors associated with the incidence and persistence of suicidal ideation. *J Affect Disord* 2011;**133**:584–590.
6. American Psychiatric Association. Practice guidelines for the treatment of psychiatric disorders compendium 2004. Tokyo, Japan: Igaku Shoin 2006: 1–966.
7. **Nakao M**, Yamanaka G, Kuboki T. Suicidal ideation and somatic symptoms of patients with mind/body distress in a Japanese psychosomatic clinic. *Suicide Life Threat Behav* 2002;**32**:80–90.
8. **Takeuchi T**, Nakao M, Yano E. Screening for major depression in the workplace: testing diagnostic accuracy of a two-item questionnaire used during mandatory testing. *Prim Care Community Psychiatr* 2006;**11**:13-19.
9. **Kessler RC**, Borgers G, Walters EE. Prevalence of and risk factors for lifetime suicide attempts in the National Comorbidity Survey. *Arch Gen Psychiatry* 1999;**56**:617–626.
10. **Suominen K**, Isometsä E, Suokas J, *et al*. Completed suicide after a suicide attempt: A 37-year follow-up study. *Am J Psychiatry* 2004;**161**:562–563.

- 1  
2  
3  
4  
5  
6  
7  
8  
9  
10  
11  
12  
13  
14  
15  
16  
17  
18  
19  
20  
21  
22  
23  
24  
25  
26  
27  
28  
29  
30  
31  
32  
33  
34  
35  
36  
37  
38  
39  
40  
41  
42  
43  
44  
45  
46  
47  
48  
49  
50  
51  
52  
53  
54  
55  
56  
57  
58  
59  
60
11. **ten Have M**, De Graaf R, van Dorsselaer S, *et al*. Incidence and course of suicidal ideation and suicide attempts in the general population. *Can J Psychiatry* 2009;**54**:824–833.
  12. **Kleinman, A**. Neurasthenia and depression: A study of somatization and culture in China. *Cult Med Psychiatry* 1982;**6**:117–190.
  13. **Simon G**, Von Korff M, Piccinelli M, *et al*. An international study of the relation between somatic symptoms and depression. *N Engl J Med* 1999;**341**:1329–1335.
  14. **American Psychiatric Association. DSM-IV-TR. Diagnostic and statistical manual of mental disorders. 4th ed., revised. Washington, DC, 2000.**
  15. **Nakao M**, Yano E. Prediction of major depression in Japanese adults: Somatic manifestation of depression in annual health examinations. *J Affect Disord* 2006;**90**:29–35.
  16. **van Gastel A**, Schotte C, Maes M. The prediction of suicidal intent in depressed patients. *Acta Psychiatr Scand* 1997;**96**:254–259.
  17. **Hawton K**, van Heeringen K. Suicide. *Lancet* 2009;**18**:1372–1381.

Table 1

*Prevalence of suicide ideation and sociodemographic characteristics of individuals with and without suicide ideation (N = 1266)*

| Variable                   | Suicidal ideation<br>+ (n = 34) |              | Suicidal ideation<br>- (n = 1232) |              | OR  | 95% CI      |
|----------------------------|---------------------------------|--------------|-----------------------------------|--------------|-----|-------------|
|                            | %                               | 95% CI       | %                                 | 95% CI       |     |             |
| Sex                        |                                 |              |                                   |              |     |             |
| Male                       | 79.4                            | [62.1, 91.3] | 87.1                              | [85.1, 88.9] | 0.6 | [0.2, 1.3]  |
| Female                     | 21.6                            | [8.7, 37.9]  | 12.9                              | [11.1, 14.9] | 1.0 | [1.0, 1.0]  |
| Age                        |                                 |              |                                   |              |     |             |
| 20–29                      | 14.7                            | [2.6, 26.8]  | 9.3                               | [7.6, 10.9]  | 1.6 | [1.0, 2.5]  |
| 30–39                      | 26.5                            | [11.4, 41.5] | 29.9                              | [27.3, 32.4] | 1.5 | [0.8, 2.8]  |
| 40–49                      | 47.1                            | [30.0, 64.1] | 29.9                              | [27.3, 32.4] | 4.2 | [1.4, 12.5] |
| 50+                        | 11.7                            | [0.4, 23.2]  | 30.9                              | [28.4, 33.6] | 1.0 | [1.0, 1.0]  |
| Smoking status             |                                 |              |                                   |              |     |             |
| Current                    | 38.2                            | [21.6, 54.8] | 36.4                              | [33.6, 39.1] | 1.0 | [0.7, 1.5]  |
| Past                       | 26.5                            | [11.4, 41.5] | 31.0                              | [28.4, 33.6] | 0.8 | [0.3, 1.9]  |
| Never                      | 35.3                            | [19.0, 51.6] | 32.6                              | [30.0, 35.3] | 1.0 | [1.0, 1.0]  |
| Alcohol consumption        |                                 |              |                                   |              |     |             |
| Every day (6–7 times/week) | 29.4                            | [13.9, 45.0] | 18.8                              | [16.6, 20.9] | 0.7 | [0.4, 1.1]  |
| Often (1–5 times/week)     | 47.1                            | [30.0, 64.1] | 46.5                              | [43.7, 49.3] | 0.6 | [0.3, 1.4]  |
| No regular drinking        | 23.5                            | [9.0, 38.0]  | 34.7                              | [32.1, 37.4] | 1.0 | [1.0, 1.0]  |
| Exercise                   |                                 |              |                                   |              |     |             |
| Irregular                  | 70.6                            | [52.5, 84.9] | 62.1                              | [59.3, 64.8] | 1.5 | [0.7, 3.1]  |
| Regular                    | 29.4                            | [15.1, 47.5] | 37.9                              | [35.2, 40.7] | 1.0 | [1.0, 1.0]  |

Table 2. Association of MDD symptoms with suicidal ideation (N = 1266)

| MDD symptoms              | n (%)      | Suicidal ideation (n = 34) |                 |                         |                 |                         |                 |               |               |                   |
|---------------------------|------------|----------------------------|-----------------|-------------------------|-----------------|-------------------------|-----------------|---------------|---------------|-------------------|
|                           |            | Model 1*<br>(Non-adjusted) |                 | Model 2†<br>(Adjusted)  |                 | Model 3‡<br>(Adjusted)  |                 | Sensitivity % | Specificity % | AUC (95% CI)      |
|                           |            | OR (95% CI)                | p value         | OR (95% CI)             | p value         | OR (95% CI)             | p value         |               |               |                   |
| <b>Depressive mood</b>    | 92 (7.3)   | <b>11.8 [5.8, 24.2]</b>    | <b>&lt;0.01</b> | <b>11.5 [5.6, 23.6]</b> | <b>&lt;0.01</b> | <b>11.2 [5.4, 23.0]</b> | <b>&lt;0.01</b> | 44.1          | 93.8          | 0.69 [0.66, 0.71] |
| <b>Loss of interest</b>   | 117 (9.2)  | <b>3.2 [1.4, 7.2]</b>      | <b>&lt;0.01</b> | <b>3.5 [1.5, 7.9]</b>   | <b>&lt;0.01</b> | <b>3.5 [1.5, 8.0]</b>   | <b>&lt;0.01</b> | 23.5          | 91.2          | 0.57 [0.55, 0.60] |
| <b>Weight loss</b>        | 48 (3.8)   | <b>4.8 [1.8, 12.9]</b>     | <b>&lt;0.01</b> | <b>4.9 [1.8, 13.5]</b>  | <b>&lt;0.01</b> | <b>5.0 [1.8, 13.8]</b>  | <b>&lt;0.01</b> | 14.7          | 96.5          | 0.56 [0.53, 0.58] |
| Insomnia                  | 455 (35.9) | <b>2.0 [1.0, 4.1]</b>      | <b>0.04</b>     | 1.9 [1.0, 3.8]          | 0.07            | 1.8 [0.9, 3.7]          | 0.09            | 52.9          | 64.5          | 0.59 [0.56, 0.61] |
| Psychomotor agitation     | 741 (58.5) | <b>2.4 [1.1, 5.2]</b>      | <b>0.04</b>     | 2.2 [1.0, 5.0]          | 0.05            | 2.2 [1.0, 4.9]          | 0.06            | 76.5          | 42.0          | 0.59 [0.56, 0.62] |
| Fatigue                   | 920 (72.7) | 2.9 [1.0, 8.2]             | 0.05            | 2.6 [0.9, 7.6]          | 0.07            | 2.6 [0.9, 7.5]          | 0.08            | 61.8          | 84.7          | 0.58 [0.55, 0.61] |
| <b>Worthlessness</b>      | 210 (16.6) | <b>8.9 [4.4, 18.1]</b>     | <b>&lt;0.01</b> | <b>8.6 [4.2, 17.5]</b>  | <b>&lt;0.01</b> | <b>8.5 [4.1, 17.4]</b>  | <b>&lt;0.01</b> | 61.8          | 84.7          | 0.73 [0.71, 0.76] |
| <b>Concentration loss</b> | 274 (21.6) | <b>6.3 [3.1, 12.7]</b>     | <b>&lt;0.01</b> | <b>6.3 [3.1, 12.8]</b>  | <b>&lt;0.01</b> | <b>6.1 [3.0, 12.5]</b>  | <b>&lt;0.01</b> | 61.8          | 79.5          | 0.71 [0.62, 0.79] |

\*Model 1 was the crude analysis. †Model 2 was adjusted for sex and age (used as categorical variables). ‡Model 3 was adjusted for sex, age (used as categorical variables), and lifestyle factors (smoking status, alcohol consumption, and exercise).



**The Relationship between Suicidal Ideation and Symptoms of Depression in Japanese Workers: A Cross sectional Study**

|                                 |                                                                                                                                                   |
|---------------------------------|---------------------------------------------------------------------------------------------------------------------------------------------------|
| Journal:                        | <i>BMJ Open</i>                                                                                                                                   |
| Manuscript ID:                  | bmjopen-2013-003643.R2                                                                                                                            |
| Article Type:                   | Research                                                                                                                                          |
| Date Submitted by the Author:   | 27-Oct-2013                                                                                                                                       |
| Complete List of Authors:       | Takeuchi, Takeaki; Teikyo University School of Medicine, Psychosomatics<br>Nakao, Mutsuhiro; Teikyo University School of Medicine, Psychosomatics |
| <b>Primary Subject Heading</b>: | Occupational and environmental medicine                                                                                                           |
| Secondary Subject Heading:      | Mental health                                                                                                                                     |
| Keywords:                       | MENTAL HEALTH, Depression & mood disorders < PSYCHIATRY, Suicide & self-harm < PSYCHIATRY                                                         |
|                                 |                                                                                                                                                   |

SCHOLARONE™  
Manuscripts

Peer Review Only



1  
2  
3 The Relationship between Suicidal Ideation and Symptoms of Depression in  
4  
5  
6 Japanese Workers: A Cross sectional Study  
7  
8  
9

10  
11  
12 Takeaki Takeuchi<sup>1)</sup>

13  
14 Mutsuhiro Nakao<sup>1)</sup>

15  
16  
17  
18  
19 1. Department of Hygiene and Public Health and Division of Psychosomatic Medicine, Teikyo  
20  
21 University School of Medicine, Tokyo, Japan  
22  
23

24  
25  
26  
27  
28 Author Contribution

29  
30 Takeaki Takeuchi and Mutsuhiro Nakao collected and analyzed the data; Takeaki  
31  
32 Takeuchi wrote the manuscript; Mutsuhiro Nakao reviewed and edited the manuscript and helped  
33  
34 in its analysis. All authors contributed to the discussion. No author has any conflicts of interest to  
35  
36 declare.  
37  
38

39  
40 Correspondence concerning this article should be addressed to Takeaki Takeuchi,  
41  
42 Department of Hygiene and Public Health, Teikyo University School of Medicine 2-11-1 Kaga,  
43  
44 Itabashi, Tokyo 173-8605 Japan.

45  
46 E-mail: takeakij@post.harvard.edu

47  
48  
49 Word Count: 1857

50  
51  
52 Number of tables: 2

53  
54  
55 *Keywords:* Japan; Major depressive disorder; Suicidal ideation; Workers  
56  
57  
58  
59  
60





1  
2  
3 Although Japan has the highest global ranking for longevity, it also has one of the highest  
4  
5 suicide rates, being ranked 9<sup>th</sup> for men and 3<sup>rd</sup> for women in the world<sup>1</sup>. From 1995 to 1998, the  
6  
7 incidence of reported suicide rose dramatically from 17 to 25 per 100,000 people, and that high  
8  
9 rate continued even in 2010<sup>2,3</sup>. Since 2005, the Japanese Cabinet Office and the Ministry of  
10  
11 Health, Labour and Welfare have been attempting to reduce the suicide rate; however the suicide  
12  
13 rate in Japan has not decreased.  
14  
15

16  
17 To reduce the number of suicides, collaborative care, that is, structured care involving a  
18  
19 greater role of nonmedical specialists for treating depression have shown potential in both  
20  
21 improving depression outcomes and decreasing suicide risk<sup>4</sup>. However, with the exception of  
22  
23 psychiatrists or psychological specialists, most doctors find it difficult to diagnose depression  
24  
25 because of the complexities involved in administering clinical interviews. In addition, doctors  
26  
27 must pay attention to those who do not perfectly match the diagnostic criteria<sup>5</sup>. If depression is  
28  
29 not diagnosed appropriately, it might be difficult to find the pathway that leads to suicide.  
30  
31  
32

33  
34 In addition to investigating the potential for depression, it would be much simpler and  
35  
36 more useful to determine the presence of suicidal ideation in individuals to assess their suicide  
37  
38 risk. Suicidal ideation, which refers to wishing that one's life would end or thoughts of harming  
39  
40 or killing oneself, represents an important phase in the suicidal process and often precedes  
41  
42 suicidal attempts or death by suicide. In clinical settings, it is relatively straightforward to ask  
43  
44 patients whether they have suicidal ideation, because this is one of the most important routine  
45  
46 questions in mental health<sup>6</sup>. Our previous study reported the prevalence of suicidal ideation  
47  
48 (30%) in a psychosomatic clinical setting<sup>7</sup>. Naturally, attempted suicide is one of the strongest  
49  
50 risk factors for death by suicide<sup>8-11</sup>, and 60% of planned first attempts occur within the first year  
51  
52 of ideation onset<sup>9</sup>. Therefore, identifying those people with suicidal ideation would be logically  
53  
54  
55  
56  
57  
58  
59  
60

1  
2  
3 the first step in reducing the incidence of suicide.  
4

5 One problem is that, in screening process such as workplaces, it might be difficult to  
6 identify people with suicidal ideation because asking workers whether they had suicidal ideation  
7 could lead to conflicts in their relationships. In addition, people from Asian countries are  
8 sometimes reluctant to speak about their mental condition, including suicidal ideation, even to  
9 their physicians, because it is considered taboo<sup>2</sup>. The Japanese in particular are less willing to  
10 express emotional distress or feelings such as suicidal ideation compared with Westerners<sup>12,13</sup>.  
11 Therefore, we try to identify both suicidal ideation and the symptoms closely related to suicidal  
12 ideation, and their role in determining an individual's risk of suicide.  
13  
14  
15  
16  
17  
18  
19  
20  
21  
22  
23

24 In Japan, more than 30,000 people, 25 per 100,000 people, have committed suicide each  
25 year for the past 10 years, and 27% of them were working people<sup>3</sup>. Thus, we thought that it was  
26 highly important to identify the prevalence of suicidal ideation and the symptoms that are closely  
27 related to suicidal ideation in the working population in Japan.  
28  
29  
30  
31  
32  
33

34 The aims of this study were twofold. First, we attempted to determine the prevalence of  
35 suicidal ideation in Japanese workers because of the lack of data at present on the prevalence of  
36 suicidal ideation in working population. Second, we examined the symptoms of major depressive  
37 disorder (MDD) which could serve as predictors of suicidal ideation even in a non-clinical  
38 setting, hypothesizing that some of these symptoms would be strongly related to suicidal ideation.  
39  
40  
41  
42  
43  
44  
45  
46  
47

## 48 **Methods**

### 49 **Participants and ethical considerations**

50 A cross-sectional design was used. Data were obtained from 1,314 full-time office  
51 workers attending health examinations in an enterprise in Tokyo, Japan. Due to missing health  
52  
53  
54  
55  
56  
57  
58  
59  
60

1  
2  
3 examination data, we excluded 48 participants, and thus, we analyzed the data from 1,266  
4  
5 Japanese workers (96% of the total number of employees, 1100 men and 166 women aged 20–69  
6  
7 years). All participants provided written informed consent after receiving a complete explanation  
8  
9 regarding the purpose, nature, and risks of the procedures used. This study was performed in  
10  
11 accordance with the World Medical Association’s Declaration of Helsinki, and its protocol was  
12  
13 approved by the Ethics Committee of the Teikyo University School of Medicine and the  
14  
15 company’s labor safety committee.  
16  
17  
18

### 19 **Assessment of major depressive disorder including suicidal ideation**

20  
21 To ascertain whether each participant met the Diagnostic Statistical Manual of Mental  
22  
23 Disorders Fourth Edition, Text Revision (DSM-IV)<sup>14</sup> criteria for MDD, clinical interviews for  
24  
25 DSM-IV axis I disorders (Structured Clinical Interview for DSM-IV for axis I disorders: SCID-  
26  
27 CV) were conducted by two study physicians specializing in both psychiatry and psychosomatic  
28  
29 medicine, assisted by a researcher trained in psychology. Suicidal ideation was also evaluated  
30  
31 during the interviews. To confirm the diagnosis of suicidal ideation, interviewees underwent  
32  
33 additional independent interviews that specifically focused on suicidal ideation.  
34  
35  
36  
37

### 38 **Assessment of lifestyle factors**

39  
40 A structured questionnaire administered by the physician was used to assess lifestyle  
41  
42 factors, including smoking status, alcohol consumption, and exercise<sup>15</sup>. Based on their smoking  
43  
44 history, the subjects were classified into three categories: current smokers, past smokers, and  
45  
46 non-smokers (no history of smoking). Alcohol consumption was classified into three categories  
47  
48 based on the weekly frequency of consumption: 6–7 times/week, 1–5 times/week, and occasional  
49  
50 drinking. Exercise was classified into two categories: regular or irregular. These questions were  
51  
52 asked as additional questions during the DSM-IV interview.  
53  
54  
55  
56  
57  
58  
59  
60

## Sample size

Based on our previous study<sup>7,8</sup>, we expected to find a difference of 30% in the rate of each symptom between both groups with and without suicidal ideation. To achieve a power of 0.90 given a two-sided  $\alpha$  of 0.05, and a ratio of our exposed sample to our control sample of 1:25, we needed at least 32 participants in the group with suicidal ideation and 800 participants without suicidal ideation. Finally, through the actual data collection we collected 34 participants with suicidal ideation and 1232 participants without suicidal ideation.

## Statistical analysis

After the characteristics of the study population were descriptively evaluated according to the presence of suicidal ideation, multiple logistic regression analyses were used to evaluate the association between suicidal ideation and each MDD symptom, by calculating crude and adjusted odds ratios (ORs). The ratios were adjusted for potential confounding factors to depression and suicide, such as sex, age, and three lifestyle factors (smoking status, alcohol consumption, and exercise). Finally, receiver operating curve (ROC) analyses were performed to examine the predictive potentials of MDD symptoms for suicidal ideation. Statistical significance was inferred at  $p < 0.05$  (two-tailed) for both the crude and adjusted ORs of the logistic analyses and the test equality of the area under the curve (AUC). All analyses were performed using STATA version 11.

## Results

A total of 34 (2.7%, 95% confidence interval [1.8, 3.8]) and 70 (5.5%, 95% CI [4.3, 6.8])

1  
2  
3 people were diagnosed with having suicidal ideation and MDD, respectively. Those with suicidal  
4  
5 ideation were more likely to be aged between 40 and 49 years, drinkers, and not exercising  
6  
7 regularly (Table 1). Only the age factor (i.e., being in one's 40s) significantly differed between  
8  
9 participants with and without suicidal ideation. Six out of the eight symptoms of MDD  
10  
11 (depressive mood, loss of interest, weight loss, psychomotor agitation, worthlessness, and  
12  
13 concentration loss) were related to suicidal ideation in both the crude and adjusted analyses  
14  
15 (Table 2).  
16  
17  
18  
19

20 Depressive mood had the strongest relationship to suicidal ideation (OR 11.2, 95% CI  
21  
22 [5.4, 23.0]), followed by worthlessness (OR 8.5, 95% CI [4.1, 17.4]) and then concentration loss  
23  
24 (OR 6.1, 95% CI [4.1, 17.4]).  
25  
26

27 Worthlessness had the highest AUC (0.73, 95% CI [0.71, 0.76]) in predicting suicidal  
28  
29 ideation, followed by concentration loss (0.71, 95% CI [0.62, 0.79]) and then depressive mood  
30  
31 (0.69, 95% CI [0.66, 0.71]).  
32  
33  
34

## 35 Discussion

36  
37 Our study revealed that the prevalence of suicidal ideation was 2.7% in Japanese workers.  
38  
39 In addition, we found that six symptoms of depression, particularly depressive mood,  
40  
41 worthlessness, and concentration loss, were related to suicidal ideation. These are potential  
42  
43 predictors that can be used in identifying suicidal ideation among Japanese workers. As we  
44  
45 expected, suicidal ideation was less prevalent in Japanese workers than in Western populations<sup>16</sup>.  
46  
47 We may have to consider that this low prevalence of suicidal ideation is not reflective of a low  
48  
49 prevalence in the general population, because some Japanese people are reluctant to speak about  
50  
51 their mental condition. While we will need to reconsider this prevalence rate in the near future,  
52  
53 this rate is useful as one of the first evaluations of suicidal ideation among workers in Japan,  
54  
55  
56  
57  
58  
59  
60



1  
2  
3 which has one of the highest rates of completed suicide worldwide.  
4

5 Although there is no way to predict who will eventually die by suicide, treating the clear  
6 warning signs for suicide can reduce patients' suffering. This study revealed a significantly  
7 positive association between some symptoms of depression and suicidal ideation. In countries  
8 like Japan, where people are reluctant to express their feelings, these symptoms might be useful  
9 in estimating an individual's risk of suicidal ideation and eventual suicide<sup>4,16</sup>.  
10  
11  
12  
13  
14  
15  
16

17 Some of the above symptoms (depressive mood and worthlessness) are similar to  
18 symptoms found to be predictors of suicidal ideation in previous studies<sup>16,17</sup>. Because the  
19 findings of previous studies applied to clinical patients, our study generalized those symptoms as  
20 a predictor of suicidal ideation to the working population. Only concentration loss was a new  
21 predictor, which might be due to the characteristics of our study sample. For workers,  
22 concentration loss would be a particularly salient symptom due to its interruption of their daily  
23 work.  
24  
25  
26  
27  
28  
29  
30  
31  
32  
33

34 Our results also showed that while participants who were between 40 and 49 years old,  
35 drinkers, and not exercising regularly had a higher tendency for suicidal ideation, only being in  
36 one's 40s was statistically significant in this study. This finding would be reasonable because the  
37 greatest increase in the number of deaths by suicide in the last decade in Japan occurred among  
38 40–49-year-old workers<sup>3</sup>. Although not statistically significant, heavy drinking has been shown  
39 to be associated with a higher risk of alcohol abuse, and not exercising regularly is associated  
40 with a greater risk of poor mental health<sup>1</sup>. We believe that completed suicides have a background  
41 of suicidal ideation. Thus, our recommended strategy to reduce suicide based on this research is  
42 to identify its potential risk by asking indirect questions related to suicidal ideation, including  
43 questions related to depressive mood, worthlessness, and concentration loss, because these  
44  
45  
46  
47  
48  
49  
50  
51  
52  
53  
54  
55  
56  
57  
58  
59  
60

1  
2  
3 symptoms appear to be related to the presence of suicidal ideation, which in turn increases the  
4  
5 likelihood of completed suicide.  
6  
7

8 Several limitations of this study warrant consideration. First, because of its cross-  
9  
10 sectional nature, our results do not directly imply that symptoms of MDD and suicidal ideation  
11  
12 are part of a clinical continuum, but rather that a simple statistical association exists after  
13  
14 adjusting for important confounding factors. To confirm the results, a more robust study such as  
15  
16 prospective cohort study would be needed. Second, because of the small sample size, the results  
17  
18 do not directly represent the general population of Japanese workers. The study is only  
19  
20 applicable to a working population in an urban area in Japan. However, this is one of the first  
21  
22 studies to report the prevalence of suicidal ideation in Japanese workers. Thus, this report could  
23  
24 be of paramount importance in Japan, where many people are reluctant to discuss their mental  
25  
26 condition.  
27  
28  
29  
30  
31  
32  
33  
34  
35  
36  
37  
38  
39  
40  
41  
42  
43  
44  
45  
46  
47  
48  
49  
50  
51  
52  
53  
54

## 55 **Acknowledgements**

56  
57  
58  
59  
60

1  
2  
3 This research was supported in part by Grant-in-Aid for Scientific Research (2009-2012)  
4  
5 (C) from the Ministry of Education, Science, Sports and Culture, Japan; and Research Grant  
6  
7  
8 (2011-2014) for Health and Welfare from Ministry of Health, Labour and Welfare, Japan (No.  
9  
10 24590761).  
11

### 12 13 14 15 **Data sharing statements**

16 No additional data available.  
17

### 18 19 20 21 22 **Competing interests: None declared**

### 23 24 **Contributorship**

25  
26 Takeaki Takeuchi and Mutsuhiro Nakao collected and analyzed the data; Takeaki Takeuchi wrote  
27  
28 the manuscript; Mutsuhiro Nakao reviewed and edited the manuscript and helped in its analysis.

29 All authors contributed to the discussion.  
30  
31

### 32 33 **Funding**

34 None  
35  
36  
37  
38  
39  
40  
41  
42  
43  
44  
45  
46  
47  
48  
49  
50  
51  
52  
53  
54  
55  
56

### 57 **References** 58 59 60

- 1  
2  
3 1. World Health Organization. Suicide rates per 100,000 by country, year and sex. 2011.  
4  
5 [http://www.who.int/mental\\_health/prevention/suicide\\_rates/en/](http://www.who.int/mental_health/prevention/suicide_rates/en/) (accessed 12 January 2013)  
6  
7
- 8 2. **Nakao M**, Takeuchi T. The suicide epidemic in Japan and strategies of depression screening  
9  
10 for its prevention. *Bull World Health Organ* 2006;**84**:492–493.  
11  
12
- 13 3. National Police Agency. Japan’s suicide statistics in 2010.  
14  
15 <http://www.npa.go.jp/safetylife/seianki/H22jisatsunogaiyou.pdf> (accessed 14 July 2013)  
16  
17
- 18 4. **Mcdowell AK**, Lineberry TW, Bostwick JM. Practical suicide-risk management for the busy  
19  
20 primary care physician. *Mayo Clin Proc* 2011;**86**:792–800.  
21  
22
- 23 5. **Zhang Y**, Law CK, Yip PS. Psychological factors associated with the incidence and  
24  
25 persistence of suicidal ideation. *J Affect Disord* 2011;**133**:584–590.  
26  
27
- 28 6. American Psychiatric Association. Practice guidelines for the treatment of psychiatric  
29  
30 disorders compendium 2004. Tokyo, Japan: Igaku Shoin 2006: 1–966.  
31  
32
- 33 7. **Nakao M**, Yamanaka G, Kuboki T. Suicidal ideation and somatic symptoms of patients with  
34  
35 mind/body distress in a Japanese psychosomatic clinic. *Suicide Life Threat Behav*  
36  
37 2002;**32**:80–90.  
38  
39
- 40 8. **Takeuchi T**, Nakao M, Yano E. Screening for major depression in the workplace: testing  
41  
42 diagnostic accuracy of a two-item questionnaire used during mandatory testing. *Prim Care*  
43  
44 *Community Psychiatr* 2006;**11**:13-19.  
45  
46
- 47 9. **Kessler RC**, Borgers G, Walters EE. Prevalence of and risk factors for lifetime suicide  
48  
49 attempts in the National Comorbidity Survey. *Arch Gen Psychiatry* 1999;**56**:617–626.  
50  
51
- 52 10. **Suominen K**, Isometsä E, Suokas J, *et al*. Completed suicide after a suicide attempt: A 37-  
53  
54 year follow-up study. *Am J Psychiatry* 2004;**161**:562–563.  
55  
56  
57  
58  
59  
60

- 1  
2  
3 11. **ten Have M**, De Graaf R, van Dorsselaer S, *et al*. Incidence and course of suicidal ideation  
4 and suicide attempts in the general population. *Can J Psychiatry* 2009;**54**:824–833.  
5  
6
- 7  
8 12. **Kleinman, A**. Neurasthenia and depression: A study of somatization and culture in China.  
9  
10 *Cult Med Psychiatry* 1982;**6**:117–190.  
11
- 12  
13 13. **Simon G**, Von Korff M, Piccinelli M, *et al*. An international study of the relation between  
14 somatic symptoms and depression. *N Engl J Med* 1999;**341**:1329–1335.  
15  
16
- 17  
18 14. American Psychiatric Association. DSM-IV-TR. Diagnostic and statistical manual of mental  
19 disorders. 4th ed., revised. Washington, DC, 2000.  
20
- 21  
22 15. **Nakao M**, Yano E. Prediction of major depression in Japanese adults: Somatic manifestation  
23 of depression in annual health examinations. *J Affect Disord* 2006;**90**:29–35.  
24  
25
- 26  
27 16. **van Gastel A**, Schotte C, Maes M. The prediction of suicidal intent in depressed patients.  
28  
29 *Acta Psychiatr Scand* 1997;**96**:254–259.  
30
- 31  
32 17. **Hawton K**, van Heeringen K. Suicide. *Lancet* 2009;**18**:1372–1381.  
33  
34  
35  
36  
37  
38  
39  
40  
41  
42  
43  
44  
45  
46  
47  
48  
49  
50  
51  
52  
53  
54  
55  
56  
57  
58  
59  
60

Table 1

*Prevalence of suicide ideation and sociodemographic characteristics of individuals with and without suicide ideation (N = 1266)*

| Variable                   | Suicidal ideation<br>+ (n = 34) |              | Suicidal ideation<br>- (n = 1232) |              | OR  | 95% CI      |
|----------------------------|---------------------------------|--------------|-----------------------------------|--------------|-----|-------------|
|                            | %                               | 95% CI       | %                                 | 95% CI       |     |             |
| Sex                        |                                 |              |                                   |              |     |             |
| Male                       | 79.4                            | [62.1, 91.3] | 87.1                              | [85.1, 88.9] | 0.6 | [0.2, 1.3]  |
| Female                     | 21.6                            | [8.7, 37.9]  | 12.9                              | [11.1, 14.9] | 1.0 | [1.0, 1.0]  |
| Age                        |                                 |              |                                   |              |     |             |
| 20–29                      | 14.7                            | [2.6, 26.8]  | 9.3                               | [7.6, 10.9]  | 1.6 | [1.0, 2.5]  |
| 30–39                      | 26.5                            | [11.4, 41.5] | 29.9                              | [27.3, 32.4] | 1.5 | [0.8, 2.8]  |
| 40–49                      | 47.1                            | [30.0, 64.1] | 29.9                              | [27.3, 32.4] | 4.2 | [1.4, 12.5] |
| 50+                        | 11.7                            | [0.4, 23.2]  | 30.9                              | [28.4, 33.6] | 1.0 | [1.0, 1.0]  |
| Smoking status             |                                 |              |                                   |              |     |             |
| Current                    | 38.2                            | [21.6, 54.8] | 36.4                              | [33.6, 39.1] | 1.0 | [0.7, 1.5]  |
| Past                       | 26.5                            | [11.4, 41.5] | 31.0                              | [28.4, 33.6] | 0.8 | [0.3, 1.9]  |
| Never                      | 35.3                            | [19.0, 51.6] | 32.6                              | [30.0, 35.3] | 1.0 | [1.0, 1.0]  |
| Alcohol consumption        |                                 |              |                                   |              |     |             |
| Every day (6–7 times/week) | 29.4                            | [13.9, 45.0] | 18.8                              | [16.6, 20.9] | 0.7 | [0.4, 1.1]  |
| Often (1–5 times/week)     | 47.1                            | [30.0, 64.1] | 46.5                              | [43.7, 49.3] | 0.6 | [0.3, 1.4]  |
| No regular drinking        | 23.5                            | [9.0, 38.0]  | 34.7                              | [32.1, 37.4] | 1.0 | [1.0, 1.0]  |
| Exercise                   |                                 |              |                                   |              |     |             |
| Irregular                  | 70.6                            | [52.5, 84.9] | 62.1                              | [59.3, 64.8] | 1.5 | [0.7, 3.1]  |
| Regular                    | 29.4                            | [15.1, 47.5] | 37.9                              | [35.2, 40.7] | 1.0 | [1.0, 1.0]  |

Table 2. Association of MDD symptoms with suicidal ideation (N = 1266)

| MDD symptoms              | Suicidal ideation (n = 34) |                            |                 |                         |                 |                         |                 |                  |                  |                   |
|---------------------------|----------------------------|----------------------------|-----------------|-------------------------|-----------------|-------------------------|-----------------|------------------|------------------|-------------------|
|                           | n (%)                      | Model 1*<br>(Non-adjusted) |                 | Model 2†<br>(Adjusted)  |                 | Model 3‡<br>(Adjusted)  |                 | Sensitivity<br>% | Specificity<br>% | AUC<br>(95% CI)   |
|                           |                            | OR (95% CI)                | p value         | OR (95% CI)             | p value         | OR (95% CI)             | p value         |                  |                  |                   |
| <b>Depressive mood</b>    | 92 (7.3)                   | <b>11.8 [5.8, 24.2]</b>    | <b>&lt;0.01</b> | <b>11.5 [5.6, 23.6]</b> | <b>&lt;0.01</b> | <b>11.2 [5.4, 23.0]</b> | <b>&lt;0.01</b> | 44.1             | 93.8             | 0.69 [0.66, 0.71] |
| <b>Loss of interest</b>   | 117 (9.2)                  | <b>3.2 [1.4, 7.2]</b>      | <b>&lt;0.01</b> | <b>3.5 [1.5, 7.9]</b>   | <b>&lt;0.01</b> | <b>3.5 [1.5, 8.0]</b>   | <b>&lt;0.01</b> | 23.5             | 91.2             | 0.57 [0.55, 0.60] |
| <b>Weight loss</b>        | 48 (3.8)                   | <b>4.8 [1.8, 12.9]</b>     | <b>&lt;0.01</b> | <b>4.9 [1.8, 13.5]</b>  | <b>&lt;0.01</b> | <b>5.0 [1.8, 13.8]</b>  | <b>&lt;0.01</b> | 14.7             | 96.5             | 0.56 [0.53, 0.58] |
| Insomnia                  | 455 (35.9)                 | <b>2.0 [1.0, 4.1]</b>      | <b>0.04</b>     | 1.9 [0.9, 3.8]          | 0.07            | 1.8 [0.9, 3.7]          | 0.09            | 52.9             | 64.5             | 0.59 [0.56, 0.61] |
| Psychomotor agitation     | 741 (58.5)                 | <b>2.4 [1.1, 5.2]</b>      | <b>0.04</b>     | 2.2 [0.9, 5.0]          | 0.06            | 2.2 [0.9, 4.9]          | 0.06            | 76.5             | 42.0             | 0.59 [0.56, 0.62] |
| Fatigue                   | 920 (72.7)                 | 2.9 [0.9, 8.2]             | 0.06            | 2.6 [0.9, 7.6]          | 0.07            | 2.6 [0.9, 7.5]          | 0.08            | 61.8             | 84.7             | 0.58 [0.55, 0.61] |
| <b>Worthlessness</b>      | 210 (16.6)                 | <b>8.9 [4.4, 18.1]</b>     | <b>&lt;0.01</b> | <b>8.6 [4.2, 17.5]</b>  | <b>&lt;0.01</b> | <b>8.5 [4.1, 17.4]</b>  | <b>&lt;0.01</b> | 61.8             | 84.7             | 0.73 [0.71, 0.76] |
| <b>Concentration loss</b> | 274 (21.6)                 | <b>6.3 [3.1, 12.7]</b>     | <b>&lt;0.01</b> | <b>6.3 [3.1, 12.8]</b>  | <b>&lt;0.01</b> | <b>6.1 [3.0, 12.5]</b>  | <b>&lt;0.01</b> | 61.8             | 79.5             | 0.71 [0.62, 0.79] |

\*Model 1 was the crude analysis. †Model 2 was adjusted for sex and age (used as categorical variables). ‡Model 3 was adjusted for sex, age (used as categorical variables), and lifestyle factors (smoking status, alcohol consumption, and exercise).
